# Supplementary material
Source: PubMed Central journal article supplement (PMC7737157)
Supplement: jamainternmed-e207090-s002.pdf [file jamainternmed-e207090-s002.pdf]

1 **Supplement 2: Protocol and Statistical Analysis Plan**

2

3 This supplement has been provided by the authors to give the readers additional information about this study  
4 evaluating the Effectiveness of Mindfulness-Based Stress Reduction (MBSR) vs. Headache (HA) Education  
5 for Migraine: A Randomized Clinical Trial, registered at ClinicalTrials.gov NCT02695498

6

7 This supplement contains the following items:

8

9 IRB approved protocol.....2-30

10 IRB Approved Meaningful Changes to Protocol After Study Initiation.....31-32

11 Statistical analysis plan.....33-34

12 Statistical Details: Data Cleaning, Missing Data.....35-37

13

14

## IRB approved protocol

**Title:** Mindfulness and Mechanisms of Pain Processing in Adults with Migraines

**Principal Investigator:** Rebecca Erwin Wells, MD, MPH, Department of Neurology, Wake Forest University Health Sciences

**Study Intervention Provided by:** N/A

**Sponsor of IND (IDE):** N/A

### Study Site

Wake Forest School of Medicine

Department of Neurology

Wake Forest Translational Science Clinical Research Unit

### OVERVIEW:

Part 1 of this study is a cross-sectional study evaluating the pain responses of migraineurs compared to healthy controls. Part 2 is a randomized clinical trial of Mindfulness Based Stress Reduction in migraineurs. Part 1 will include both healthy volunteers and migraineurs while Part 2 will only include migraineurs. Migraineurs may participate in both parts of the study.

**The protocol is split into Part 1 and Part 2.**

## PART 1

### PRÉCIS

**Title:** Mindfulness and Mechanisms of Pain Processing in Adults with Migraines

**Primary Objective of this study:** Assess experimental heat pain responses (pain intensity, pain unpleasantness, pain catastrophizing, emotional reactivity) in migraineurs vs. healthy controls.

### Design and Outcomes

To accomplish this objective, we will conduct a cross-sectional study in migraineurs (interictally, i.e., between migraine attacks) and healthy controls to compare responses to experimental heat pain intensity and unpleasantness and correlate these results to differences in emotional reactivity and pain catastrophizing.

**Outcomes:** Stimulus-response curves will be generated for each subject using the logarithmic equation:  $\log(\text{VAS pain ratings}) = \log(t - 35) * \text{coefficient} + \text{intercept}$  where  $t$  represents stimulus temperature.<sup>1</sup> The coefficient and intercept generated for heat pain intensity and heat pain unpleasantness will both be used as outcome variables, as well as scores from the Pain Catastrophizing Scale (PCS)<sup>2</sup>, and the Difficulty in Emotion Regulation Scale (DERS).<sup>3</sup>

### Interventions and Duration

Participants will complete ONE study visit where they will complete the PCS and DERS instruments and will complete Quantitative Sensory Testing (QST) pain measurements. We will compare responses to experimental heat pain intensity and unpleasantness on both migraineurs and healthy controls to compare and correlate these results to differences in their emotional reactivity and pain catastrophizing.

### Sample Size and Population

The subject population consists of 98 participants (49 migraineurs and 49 healthy controls) who will be recruited for Part I. Participants will be of any gender and ethnicity. Migraineurs will be recruited through the Department of Neurology, Internal Medicine, Family Medicine, and the Emergency Department from Wake Forest School of Medicine. In addition, recruitment will occur from Dr. Timothy Houle's Headache research program, via Wake Forest's electronic medical record system, advertisements/flyers and the Downtown Health Plaza (DHP). Healthy Controls will be recruited from the greater Winston-Salem area through IRB-approved local flyers (posted at the four local colleges, including Wake Forest University), advertisements placed online (e.g. Craigslist) and in local newspapers (e.g. the Winston-Salem Journal), and through the Wake Forest Baptist Hospital institutional database of research volunteers. Interested persons will contact the study staff for a telephone screen. A study cell phone will be set up so that interested persons can call at any time. The phone will be secured and encrypted via our AirWatch Mobile Device Management solution.

70 All referring providers will be invited to a presentation to thank them for their assistance and to present the data  
71 results from the study. At the presentation, the referring providers will be entered into a drawing for a \$100 gift card  
72 whether the referred subject enrolls in the study or not.

73  
74 To ensure comparable groups, migraineurs and controls will be matched on age ( $\pm 5$  yrs), gender, and race.

## 75 **STUDY OBJECTIVES**

### 76 **Primary Objective**

77 Primary Objective of this study: To assess experimental heat pain responses (pain intensity, pain unpleasantness,  
78 pain catastrophizing, emotional reactivity) in migraineurs vs. healthy controls.

79 Hypotheses: Migraineurs will report higher pain intensity and pain unpleasantness levels in response to  
80 experimentally induced pain than controls; (1b): Pain catastrophizing and emotional reactivity will moderate the  
81 association between pain unpleasantness and pain intensity; (1c): Pain catastrophizing and emotional reactivity  
82 scores will be positively associated with pain unpleasantness levels.

## 83 **BACKGROUND AND RATIONALE**

### 84 **Background on Condition, Disease, or Other Primary Study Focus**

85 **Migraine is common and disabling.** Migraine affects 36 million Americans and costs \$15 billion/year due to lost  
86 workdays, diminished productivity, and increased health care utilization.<sup>4-6</sup> Affective/cognitive processes such as  
87 pain catastrophizing and emotional reactivity often play a major role in migraine pain and disability and may be just  
88 as important to target as the sensory aspect. High pain catastrophizing, a maladaptive cognitive process of  
89 exaggerated pain rumination,<sup>7-11</sup> is associated with more pain and disability across clinical pain syndromes,  
90 including headache.<sup>12-21</sup> Affective disturbance is highly comorbid with migraine and associated with migraines  
91 becoming chronic.<sup>22-25</sup> Due to this cognitive/affective load that builds over time in migraine, we hypothesize that  
92 migraine alters the relationship between the sensory and affective dimensions of pain processing.

### 93 **Study Rationale**

94 Our current tools of migraine pain measurement are inadequate to distinguish the overall burden of suffering, as  
95 there is an over reliance on a single numerical pain score to represent the entire pain experience. For example, one  
96 patient with a level 8/10 migraine pain may still be functioning at work while another may be writhing in bed at  
97 home, completely disabled. Measuring and targeting the affective component, in addition to the sensory component  
98 of pain, may capture this discrepancy in disease burden. In the chronic pain world, distinguishing between the  
99 sensory and affective components of pain has yielded useful insights. For example, cancer pain is impacted by high  
100 affective pain ratings while musculoskeletal pain has much lower affective pain ratings. Interestingly, this work has  
101 not been extended into the migraine world, as though migraine pain is viewed as a purely sensory pain experience. If  
102 affective mechanisms are, in fact, more important than previously realized, this could explain the excess burden of  
103 migraine in people with comorbid affective conditions like anxiety, depression, and with past histories of emotional  
104 or sexual abuse. The affective component of migraine pain may be just as important as the sensory component to  
105 target and measure since it significantly impacts outcomes, disability, and has therapeutic treatment implications.

106  
107 Quantitative sensory testing (QST) is a robust lab paradigm (not a clinical experience) that delivers one painful  
108 noxious thermal stimuli and asks for simultaneous pain intensity and pain unpleasantness scores. By using this in  
109 our research, we will be able to differentiate the sensory (pain quality—what the pain feels like) from the affective  
110 (how awful/unpleasant the pain feels) components of experimental pain in normal controls vs. migraineurs. If there  
111 is a difference between QST measurements in healthy controls vs. migraineurs, an intervention's impact could be  
112 determined if it brings migraineurs' QST results closer to healthy controls' QST results. QST results could become a  
113 marker of migraine activity. Affective components of pain may be targeted in ways that do not involve medication,  
114 which is highly desirable in a condition that is persistent throughout a lifetime and principally affects women of  
115 childbearing potential. In summary, distinguishing the sensory from affective components of pain in our research  
116 will help us determine if QST measurements can be used as a marker of migraine activity.

117  
118 Migraineurs may process noxious stimuli differently than healthy non-migraineurs,<sup>26</sup> but we do not fully understand  
119 this difference. Using acute experimental pain in adults with clinical headache pain may help us understand the  
120 cognitive and affective mechanisms involved in both types of pain processing. This study will help disentangle the  
121 sensory (pain intensity) and affective (pain unpleasantness) components that comprise the subjective pain experience  
122 and we will be able to compare these components in migraineurs vs. healthy controls.

123  
124 We hypothesize that having migraine affects the relationship between the sensory and affective dimensions of pain  
125 processing, and this relationship is moderated by these affective/cognitive factors that build over time in migraineurs

126 (e.g., pain catastrophizing and emotional reactivity). We will assess this hypothesized difference directly by  
 127 evaluating pain intensity (sensory component of experimental pain) and unpleasantness (affective component of  
 128 experimental pain). Interestingly, migraineurs exhibit lower thermal pain and tolerance thresholds, lower mechanical  
 129 pain thresholds, enhanced pain expectation, and deficits of conditioned pain modulation and habituation.<sup>26-32</sup> When  
 130 compared to healthy controls, we hypothesize that: (Figure 1) A) migraineurs will exhibit significantly higher pain  
 131 reports in response to experimentally induced pain; B) pain catastrophizing and emotional reactivity will moderate  
 132 the association between pain unpleasantness and pain intensity; and C) the affective/cognitive factors (Figure 1,  
 133 Box A) will be positively associated with pain unpleasantness.  
 134 No previous studies have evaluated differences in experimental pain intensity vs. pain unpleasantness in migraineurs  
 135 vs. controls. As migraine pain uniquely involves many altered sensory phenomenon (e.g., photophobia,  
 136 phonophobia), it cannot be assumed that responses to experimental pain in migraine will be the same as other  
 137 clinical pain syndromes. Further, different clinical pain syndromes have distinct responses to pain intensity vs. pain  
 138 unpleasantness.<sup>33</sup>

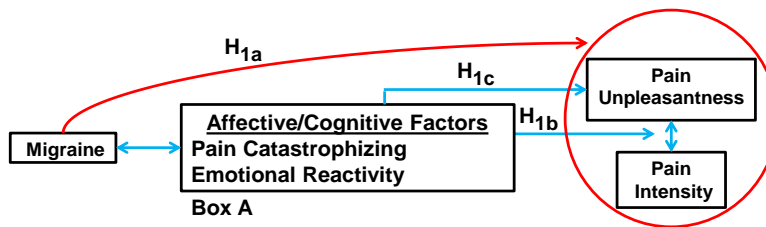

141 **Figure 1**  
 142 **Theoretical Model of Experimental Pain Responses in Migraineurs.**  
 143 **H<sub>1a</sub>, H<sub>1b</sub>, and H<sub>1c</sub> refer to the corresponding Hypotheses from Aim 1**

149 **STUDY DESIGN**

151 We will conduct a cross-sectional study in migraineurs (interictally, i.e., between migraine attacks) and healthy  
 152 controls to compare responses to experimental heat pain intensity and unpleasantness and correlate these results to  
 153 differences in emotional reactivity and pain catastrophizing.

154 **SELECTION AND ENROLLMENT OF PARTICIPANTS**

155 **Inclusion Criteria**

156 Inclusion criteria for Healthy Controls: ≥18yo; pain free and healthy, without any major medical or psychiatric  
 157 conditions

158 Inclusion Criteria for Migraineurs: ≥18yo with >1 yr of migraines and currently 4-20 days/month with migraines,  
 159 although no migraine the day of study visit (see Table 1 for migraine diagnosis) or pain relieving medications within  
 160 12 hours of study visit.

161 **Exclusion Criteria**

162 **Exclusion criteria for Healthy Controls:** Diagnosis of migraine, probable migraine, Current regular (weekly or  
 163 more often) practice of meditation or other mind-body intervention  
 164 or frequent headaches of any type other than tension-type headaches on three or fewer days/month.

165 **Exclusion criteria for both:** Any major unstable medical/psychiatric illness (e.g., hospitalization within 90 days,  
 166 suicide risk, etc.); severe clinical depression/anxiety (with PHQ-9 scores >20); chronic pain condition (e.g.,  
 167 fibromyalgia, migraines for healthy controls, etc.) or sensory abnormalities (e.g., neuropathy, Raynaud's, etc.);  
 168 current regular (weekly or more often) practice of meditation or other mind-body intervention; diagnosis of  
 169 medication overuse headache or chronic migraine. Migraineurs will be studied if they have been headache-free the  
 170 day of the study visit. Participants may be currently taking migraine medications, as long as they do not have a  
 171 diagnosis of medication overuse headache. Volunteers with no pain ratings to frankly noxious stimuli (temperatures  
 172 > 49°C) or excessive responses to threshold temperatures (~43°C) will be excluded. Pregnant subjects will be  
 173 excluded from all portions of the study due to possible unknown risks of frankly noxious stimuli. Due to unknown  
 174 risks and potential harm to the unborn fetus, sexually active women of childbearing potential must use a reliable  
 175 method of birth control while participating in this study. Reliable methods of birth control are: abstinence (not  
 176 having sex), oral contraceptives, intrauterine device (IUD), DepoProvera, tubal ligation, or vasectomy of the partner  
 177 (with confirmed negative sperm counts) in a monogamous relationship (same partner). An acceptable, although less  
 178 reliable, method involves the careful use of condoms and spermicidal foam or gel and/or a cervical cap or sponge.

181 **Table 1: Migraine Diagnosis\***

- At least 5 attacks, not attributable to another disorder, with:
  - Headache lasting 4-72 hours (untreated or unsuccessfully treated)
  - Headache with at least 2 of the 4:
    - Unilateral location
    - Pulsating quality
    - Moderate or severe pain intensity
    - Aggravation by or causing avoidance of routine physical activity (e.g. walking or climbing stairs)
  - During headache at least 1 of the 2:
    - Nausea and/or vomiting
    - Photophobia and phonophobia

\*According to the International Classification of Headache Disorders-II Guidelines

182  
183

184 **Study Enrollment Procedures**

185 The subject population consists of 98 participants (49 migraineurs and 49 healthy controls) who will be recruited for  
186 Part I. Participants will be of any gender and ethnicity. To ensure comparable groups, participants and controls will  
187 be matched on age ( $\pm 5$  yrs), gender, and race.

188 We have obtained IRB approval for all recruitment procedures (Wake Forest IRB protocol # IRB00027845).

189 Participants with migraines will be recruited through several different mechanisms 1) Wake Forest Departments of  
190 Neurology, Internal Medicine, Family Medicine and Emergency Department; 2) Wake Forest Houle Headache  
191 Research Center 3) Wake Forest Electronic Medical record system; 4) Local flyers, radio/television/newspaper  
192 advertisements. The primary source of recruitment will be through the Wake Forest Department of Neurology  
193 clinics.

194  
195 The primary source of recruitment will be through the Wake Forest Department of Neurology clinics. Dr. Wells has  
196 her own headache clinic within the department, where she has seen over 300 headache patients in the last year (on  
197 average 9 new and 6 follow-up patients per week). Patients will also be recruited through the Wake Forest primary  
198 care clinics. Flyers will be placed throughout the hospital and specifically in the clinics of Neurology, Internal  
199 Medicine, OB/Gyn, and Family medicine and in the Emergency Department. On average, Wake Forest sees  
200 >800 patients/year in the Emergency Department with a diagnosis of migraine. Presentations made to medical  
201 students, residents, and faculty at Wake Forest in these departments to further inform clinicians about the trial and  
202 invite them to refer eligible patients. Further, four research assistants are available through the WF emergency  
203 department and actively screen patients 6 days/week, 18 hours/day (108 hours/week). The Houle Headache  
204 Research Center has a successful record of recruiting headache patients for clinical research, recruiting 3-5 headache  
205 patients/week over the last 5 years. Wake Forest has a newly implemented electronic record system, "WakeOne"  
206 (an Epic program), and with IRB approval, we can query our Translational Data Warehouse for all patients seen at  
207 Wake Forest with a diagnosis of migraine (ICD-9 code 346) and then be able to securely have access to their data to  
208 be able to contact them. Conducting such a search reveals 17,494 records of patients with a diagnosis of migraines  
209 seen at Wake Forest in the past five years. Finally, we will use multiple local advertising mechanisms to recruit  
210 participants, such as local newspapers (e.g. Winston Salem Journal), magazines (Forsyth Woman, etc.) local  
211 National Public Radio service, local television network stations, press releases, and social media (Facebook, etc.).  
212 For adults with migraines, "opt-out" letters will be sent to potential participants and then they will be contacted by  
213 study staff for a telephone screen.

214  
215 Healthy Controls will be recruited from the greater Winston-Salem area through IRB-approved local flyers (posted  
216 at the four local colleges, including Wake Forest University), advertisements placed online (e.g. Craigslist) and in  
217 local newspapers (e.g. the Winston-Salem Journal), and through the Wake Forest Baptist Hospital institutional  
218 database of research volunteers.

219  
220 **Screening Process-Telephone Screen:**

221 A study investigator will contact interested participants for a pre-screening telephone interview. At the beginning of  
222 the phone call, potential subjects will be informed of the nature and sensitivity of the questions, asked whether this is  
223 an appropriate time for them to answer these questions, and told how long the phone call is expected to take.  
224 Participants will be offered the option of completing the pre-screening in person, if they wish and if it is feasible.

225 The pre-screening telephone interview will be performed to explain the protocol, determine eligibility, discuss  
226 informed consent, and answer questions. If eligible, they will then be offered participation. Those interested and  
227 eligible will be either immediately scheduled for a screening visit or will be called in the future to set it up. A letter will  
228 then be sent to them, with the consent form attached for review ahead of time if they would like, in advance of their  
229 study visit.

### 230 231 **Consenting procedures:**

232 We will obtain consent before the experiment begins at the study visit. At the onset of the study visit, participants  
233 will be provided informed consent by the PI or a qualified study team member. The consenting process will occur in  
234 a private clinic room. Subjects will be given time to ask questions and can discuss with family members. The  
235 consent form states the title and purpose of the study, an estimate of how many people may enroll, the duration of  
236 participation, the procedures that will be followed, any reasonably foreseeable risks or discomforts, and benefits to  
237 the participants or others that may be expected from the research. Information is provided about the disclosure and  
238 confidentiality of protected health information they will provide, that there is no cost to participants in the study,  
239 who sponsors the study, what happens if they experience an injury or illness as a result of participating, and whom  
240 to call if they have a question or problem. Participants will be informed of payment (\$40 for completion of the study  
241 visit). The telephone number of the Chairman of the Institutional Review Board will also be included for questions  
242 regarding rights as research subjects. The consent form will be signed and dated by the participant and by the person  
243 obtaining consent. The consent form has been approved by Wake Forest IRB (IRB protocol # IRB00027845).

### 244 **Screening**

245 Screening evaluations that will occur at the study visit for inclusion/exclusion include:

- 246 • Full Neurology evaluation to confirm diagnosis and inclusion/exclusion criteria

247

## 248 **STUDY INTERVENTIONS**

### 249 **Interventions, Administration, and Duration**

250 There will only be ONE study visit, which will have 3 parts.

#### 251 **Study Visit (Parts A, B, C):**

252 **Part A:** Participants will meet with a member of the study team to: 1) review study protocol; 2) obtain informed  
253 consent; 3) obtain detailed health history/exam to confirm inclusion/exclusion criteria.

254

255 **Part B: Psychological Measures:** Before the experimental session, participants will use REDCap to complete the  
256 questionnaires (see Table 6 for migraineurs and Table 7 for healthy volunteers).

257

#### 258 **Part C: Experimental Session of Quantitative Sensory Testing (QST) Measurements:**

259 **Thermal Probe:** MEDOC TSA-II will deliver thermal stimuli with a 16 x 16 mm thermal probe. All temperatures  
260 will be < 50°C and no stimulus as designed produces tissue damage. We have significant experience using this  
261 technique and probe with no adverse events (Coghill's lab on > 750).

262

263 **Psychophysical Training:** To gain experience rating pain, subjects will be familiarized with 32, 5-second duration  
264 stimuli (35 to 49°C) with the Visual Analogue Scale (VAS), a 15 cm plastic sliding scale used to quantify pain  
265 sensation intensity and degree of unpleasantness.<sup>37</sup> The VAS is an ideal pain measurement scale because of its ratio  
266 scale properties combined with its ease of administration and scoring.<sup>38</sup> The minimum rating is “no pain sensation”  
267 or “not all unpleasant” whereas the maximum is designated as “most intense imaginable” or “most unpleasant  
268 imaginable.” The training will be conducted on the left arm, a location away from increased sensitivity/allodynia of  
269 head/neck regions often seen in patients with migraines.

270

271 **Pain Threshold Assessment:** The temperature of the probe will begin at 32°C and will increase at a rate of 0.5°C per  
272 second. The subject will be instructed to verbally respond when he or she first detects a sensation of pain. The  
273 thermode will return to baseline once the button is pressed. This will be performed up to four times, and the heat  
274 pain threshold will be determined as the average of the temperatures at which the stimulus was first perceived as  
275 painful (Yarnitsky and Sprecher, 1994). Stimulus temperatures employed for pain threshold testing will not exceed  
276 50°C. This will be conducted on the right arm.

277

278 **Experimental Session:** We will administer the noxious thermal stimulation on the right calf by starting at 35°C and  
279 increasing with a 6°C rise/fall rate with a 5 second plateau up to the randomly administered temperatures of 43, 45,  
280 47, and 49°C. Each temperature will be repeated x 3 and delivered pseudorandomly. To minimize sensitization,

281 habituation, and hyperalgesia, all trials will be separated by 30 seconds and systematically distributed over the calf  
 282 to minimize repetitive stimulation of the same skin site.<sup>1,37,39</sup> Perception of intensity and unpleasantness will be  
 283 measured with the VAS scale after each temperature. Each series will be repeated twice. Dr. Wells has been trained  
 284 in the performance and analysis of QST measurements.

285  
 286 The specified arm/leg positioning of the probe may be adjusted if needed.

287 **Handling of Study Interventions**

288 N/A

289 **Concomitant Interventions**

290 **Allowed Interventions**

291 Participants may continue all current treatments for their migraines while participating in this study.

292 **Required Interventions**

293 To participate in the study, patients must not currently have a migraine at the time of the study visit;  
 294 migraineurs will be studied if they have been headache-free the day of the study visit. If participants arrive at  
 295 the study visit and actively have a headache, they will be re-scheduled for completion of the study visit when  
 296 headache-free.

297 **Prohibited Interventions**

298 N/A

299 **Adherence Assessment**

300 The survey assessments will be completed using REDCap and study personnel will ensure all questions are  
 301 answered before participants leave each session. Study personnel will also be conducting the QST pain  
 302 assessments so adherence to both pain testing and survey assessments will be high.

303 **STUDY PROCEDURES**

304  
 305

**Table 2- Summary of Schedule of Evaluations-Part I**

| Task                                                        | Telephone Screen | Study Visit |
|-------------------------------------------------------------|------------------|-------------|
| Confirm Eligibility                                         | X                | X           |
| Review Study Protocol                                       | X                | X           |
| Sign Informed Consent Form                                  |                  | X           |
| Health history/exam to confirm inclusion/exclusion criteria |                  | X           |
| Complete Questionnaires                                     |                  | X           |
| QST Measurements                                            |                  | X           |

306 QST: Quantitative Sensory Testing

307

308 **Description of Evaluations**-See above in Study Enrollment Procedures and Study Interventions

309 **SAFETY ASSESSMENTS**

310 **Experimental Heat Pain Assessments:** The quantitative sensory testing may cause brief pain, but all temperatures  
 311 will be < 50°C and no stimulus as designed produces tissue damage. The thermal probe used for this experiment,  
 312 MEDOC TSA-II, will deliver thermal stimuli with a 16 x 16 mm thermal probe. The pain stimuli are chosen so that  
 313 most people can tolerate them. These stimuli have been used for many years with no harmful physiological or  
 314 psychological complications. However, the heat may cause redness of the skin for up to several hours, but does not  
 315 cause any blistering.

316 The subject can easily pull away from the device if the feeling is not tolerable. The laboratory staff are experts in  
 317 conducting the heat-pain intervention and the temperature of the thermal heat probe will be monitored at all times.  
 318 Dr. Coghill's lab has conducted this procedure on over 750 participants and no serious adverse events have been  
 319 associated with this device. A computer controlled device that touches the skin is used to apply the heat used for  
 320 sensory testing. In extremely rare cases, the computer controlled stimulator has been reported to malfunction and to  
 321 cause a burn to the small skin region being tested. Since this device will not be strapped to the participant's leg or  
 322 arm, the participant can easily pull away from this device and stop stimulation at any time.

323

324 **Reporting Procedures**

325 We will promptly report any unanticipated problems, serious and unexpected adverse events,  
 326 deviations or protocol changes to the IRB and Data Safety and Monitoring Board (See Data  
 327 Safety and Monitoring Board for more details).

328  
329 Serious adverse events (SAEs) that are unanticipated, serious, and possibly related to the study intervention will be  
330 reported to the I-DSMB, Wake Forest School of Medicine IRB, and NCCIH in accordance with requirements.  
331

332 Unexpected fatal or life-threatening AEs related to the intervention will be reported to the NCCIH  
333 Program Officer within 7 days. Other serious and unexpected AEs related to the intervention will  
334 be reported to the NCCIH Program Official within 15 days.  
335

336 Anticipated or unrelated SAEs will be handled in a less urgent manner but will be reported to the  
337 I-DSMB, Wake Forest School of Medicine IRB, NCCIH, and other oversight organizations in  
338 accordance with their requirements. In the annual AE summary, the I-DSMB Report will state  
339 that they have reviewed all AE reports.  
340

341 The WFSM Institutional Data & Safety Monitoring Board (I-DSMB) will monitor the study for  
342 purposes of evaluating participant safety and study integrity. The I-DSMB is a Dean-appointed,  
343 multi-disciplinary, standing committee that is available to provide independent oversight for  
344 human research studies conducted by WFSM or by WFSM-affiliated faculty investigators. The  
345 board will review the progress of and safety for the study on a regular basis as seen below in the Table 3. The  
346 DSMB will meet to review safety data at least once annually while the study has active participants, even if the  
347 prespecified review targets, as specified above, have not been met. There will be no fee for the independent  
348 monitoring of the study. All protocol deviations and adverse events will be promptly reported to the I-DSMB as well  
349 the IRB. See DSMB plan for more details.  
350

351 **Table 3-Safety Reporting of Data**

| Data type                                                                | Frequency of review | Reviewer        |
|--------------------------------------------------------------------------|---------------------|-----------------|
| Subject accrual (including compliance with protocol enrollment criteria) | Quarterly           | PI, DSMB        |
| Status of all enrolled subjects, as of date of reporting                 | Quarterly           | PI, DSMB        |
| Adherence data regarding study visits and intervention                   | Bi-annually         | PI, DSMB        |
| AEs                                                                      | Bi-annually         | PI, DSMB        |
| SAEs                                                                     | Per occurrence      | PI, DSMB, NCCIH |

352  
353 **STATISTICAL CONSIDERATIONS**

354 **General Design Issues**

355 *Hypothesis 1a: Adults with migraines will have a greater response to experimental pain than healthy controls.*

356 *Hypothesis 1b: Adults with migraines will have higher levels of pain unpleasantness after controlling for pain intensity compared to controls.*

357  
358 *Hypothesis 1c: Adults with the highest pain catastrophizing and emotional reactivity scores will have the highest levels of pain unpleasantness.*

360 **Sample Size and Randomization**

361 **Sample Size Calculation:** Using the marginal benefit formula for repeated measures (Vickers),<sup>40</sup> and assuming an  
362 average within-person correlation between repeated measurements of 0.5, a sample size of 48/group will give us  
363 80% power to detect an effect size as low as  $d=0.62$  for the group main effect (Hypotheses 1a and 1b). Thus, if the  
364 average VAS rating in the controls is 3 ( $\pm 2$  SD), we will be able to detect a VAS rating of 4.24 in migraineurs;  
365 smaller differences are unlikely to have clinical significance. For hypothesis 1c, 98 participants will also give us  
366 84% power to detect a bivariate correlation of at least 0.4 between pain catastrophizing scores or emotional  
367 reactivity scores and pain unpleasantness levels ( $r \leq 0.4$  not likely of clinical significance).  
368

368 **Outcomes**

369 Stimulus-response curves will be generated for each subject using the logarithmic equation:  $\log(\text{VAS pain ratings}) = \log(t - 35) * \text{coefficient} + \text{intercept}$  where  $t$  represents stimulus temperature.<sup>1</sup> The coefficient and intercept  
370 generated for heat pain intensity and heat pain unpleasantness will both be used as outcome variables, as well as  
371 scores from the PCS and the DERS.  
372



373 **Data Analyses**

374 **Statistical Analyses:** We will use mixed effects hierarchical regression models with a distribution and link function  
375 appropriate to the outcome (e.g., the best fitting distribution as defined by model selection). Repeated measures  
376 within each participant (i.e., experimental trials within a session) will be handled using subject-level random effects.  
377 We do not expect missing data for this Aim, given the controlled nature of the experimental session and electronic  
378 data capture. The specific analyses are outlined for each hypothesis:

379  
380 Analyses 1a: We will separately regress the individual pain outcomes (pain intensity, pain unpleasantness) on the  
381 factorial effects for group (migraine, control), stimulus (43, 45, 47, and 49 C), and repeated experimental block (1,  
382 2, and 3). Absent any higher order two-way (e.g., group x stimulus) or three-way (e.g., group x stimulus x block)  
383 interaction involving group, we will interpret a statistically significant group main effect as evidence that the two  
384 groups differ in their experimental pain reports.

385  
386 Analyses 1b: We will run the same model as 1a but exclusively using pain unpleasantness as the outcome. We will  
387 add pain intensity as a predictor, to “control” for pain intensity reports. In this way, we will examine group  
388 differences in pain unpleasantness after controlling for pain intensity ratings (i.e., do the groups differ in degree of  
389 unpleasantness after accounting for the sensory aspect of the stimulus?)

390  
391 Analyses 1c: We will regress pain unpleasantness on stimulus, block, and pain intensity ratings, but will also add  
392 catastrophizing and emotional reactivity scores as subject-level predictors. A statistically significant effect for the  
393 predictor (catastrophizing or emotional reactivity) will be interpreted as support for an association between the  
394 predictor and outcome (pain unpleasantness).

395  
396 **DATA COLLECTION AND QUALITY ASSURANCE**

397 **Research material obtained from human subjects (specimens, records, data).**

398 The study data will be collected and managed using REDCap electronic data capture tools hosted at Wake Forest  
399 School of Medicine.<sup>41</sup> REDCap (Research Electronic Data Capture) is a secure, web-based application designed to  
400 support data capture for research studies, providing: 1) an intuitive interface for validated data entry; 2) audit trails  
401 for tracking data manipulation and export procedures; 3) automated export procedures for seamless data downloads  
402 to common statistical packages; and 4) procedures for importing data from external sources.

403 **PARTICIPANT RIGHTS AND CONFIDENTIALITY**

404 **Institutional Review Board (IRB) Review**

405 **Informed Consent Forms**

406 IRB approval of these procedures has been obtained (IRB protocol # IRB00027845). Prior to participating in any  
407 phase of these studies, informed consent will be obtained from all subjects by personnel directly associated with this  
408 study. All procedures and risks will be fully explained to subjects. Informed consent from healthy subjects will be  
409 indicated/documentated by the subject’s signature on a consent form. Subjects will also receive a copy of the consent  
410 form. Subjects will be recruited for studies via postings on campus, Internet advertisements, and other printed  
411 advertisements in the community. If necessary to obtain adequate minority representation, under-represented racial  
412 groups will be targeted specifically for recruitment.

413  
414 **Participant Confidentiality and Data Storage**

415 Confidentiality will be protected by collecting only information needed to assess study outcomes, minimizing to the  
416 fullest extent possible the collection of any information that could directly identify subjects, and maintaining all  
417 study information in a secure manner. Storage of all data will be electronically entered on a password protected  
418 network drive. To help ensure subject privacy and confidentiality, only a unique study identifier will appear on the  
419 data collection form. All question and answers will be recorded by research assistants, placed in confidential subject  
420 folders, and stored on a separate master log. Any collected patient identifying information corresponding to the  
421 unique study identifier will be maintained on a separate master log. The master log will be kept secure, with access  
422 limited to designated study personnel. Following data collection subject identifying information will be destroyed at  
423 the earliest opportunity, consistent with data validation and study design, producing an anonymous analytical data  
424 set. Data access will be limited to study staff. Data and records will be kept locked and secured, with any computer  
425 data password protected. No reference to any individual participant will appear in reports, presentations, or  
426 publications that may arise from the study.

427

428 Per copyright agreement for the Social Connectedness Scale-Revised (SCS-R), the PI has agreed to send de-  
429 identified results of the SCS-R and basic demographics to the author of the measure for possible secondary data  
430 analysis.

431  
432 **Conflict of Interest:** There are no conflicts of interest.

433 **Benefits to Participants**

434 This study does not present the prospect of direct benefit to the participants. However, the study  
435 will provide the opportunity to gain a better understanding of how migraine affects pain processing.

436  
437 **PUBLICATION OF RESEARCH FINDINGS**

438 We plan to publish our findings in top-tier scientific, peer-reviewed journals.

439  
440 **PART 2**

441 **PRÉCIS**

442 **Objectives**

443 Primary objective: Test the impact of MBSR in adults with migraines on clinical headache pain.

444  
445 Secondary Objectives: Test the impact of MBSR in adults with migraines on experimental heat pain, mindfulness,  
446 pain acceptance, pain catastrophizing, emotional reactivity, and headache-related disability compared to an  
447 education control group; determine factors that predict MBSR response on migraine pain.

448  
449 **Design and Outcomes**

450 We will conduct a prospective, randomized controlled trial in 98 adults with migraines randomized to either MBSR  
451 or a migraine/stress education control group to assess the impact of MBSR on the sensory and affective aspects of  
452 clinical and experimental pain in adults with migraines and to determine predictors of clinical efficacy

453  
454 **Interventions and Duration**

455 Participants will be randomized to either an Mindfulness Based Stress Reduction Course (MBSR) or an Education  
456 control group; both will meet weekly for 2.5 hours for 8 weeks, and may be assigned daily homework of  
457 approximately 30 minutes/day. MBSR is a standardized course in mindfulness meditation and yoga and the control  
458 group will be educated about migraine pathophysiology, headache triggers, stress, gentle stretches, and daily  
459 migraine readings. The goal of the control group is to match the time/attention/expectation of the MBSR group,  
460 without providing key ingredients of mindfulness meditation or yoga. The control group will be taught by a health  
461 care provider trained in headache care.

462  
463 **Sample Size and Population**

464 98 adults with migraines will be randomized 1:1 to either MBSR or the education control group. Migraineurs will  
465 be recruited through the Department of Neurology, Internal Medicine, Family Medicine, and the Emergency  
466 Department from Wake Forest School of Medicine. In addition, recruitment will occur from Dr. Timothy Houle's  
467 Headache research program, via Wake Forest's electronic medical record system, advertisements/flyers and the  
468 Downtown Health Plaza (DHP)

469 **STUDY OBJECTIVES**

470 **Primary Objective**

471 Primary objective: Test the impact of MBSR in adults with migraines on clinical headache pain.

472  
473 **Secondary Objectives**

474 Secondary Objectives: Test the impact of MBSR in adults with migraines on experimental heat pain, mindfulness,  
475 pain acceptance, pain catastrophizing, emotional reactivity, and headache-related disability compared to an  
476 education control group; determine factors that predict MBSR response on migraine pain.

477 **BACKGROUND AND RATIONALE**

478 **Background on Condition, Disease, or Other Primary Study Focus**

479 Migraine is common and disabling, affecting 36 million Americans and costing \$15 billion/year due to lost  
480 workdays, diminished productivity, and increased health care utilization.<sup>4-6</sup> Affective/cognitive processes such as  
481 pain catastrophizing and emotional reactivity often play a major role in migraine pain and disability and may be just  
482 as important to target as the sensory aspect. Due to this cognitive/affective load that builds over time in migraine, we  
483 hypothesize that: A) migraine alters the relationship between the sensory and affective dimensions of pain

484 processing; and B) therapies like Mindfulness-Based Stress Reduction (MBSR) that target these factors may be  
 485 especially beneficial and may differentially influence the affective component of migraine. MBSR is a standardized  
 486 course in mindfulness meditation and yoga with beneficial effects on many health outcomes,<sup>42</sup> including chronic  
 487 pain.<sup>43-49</sup>

488 **Study Rationale**

489 Meditation differentially decreases affective (i.e., pain unpleasantness) over sensory (i.e., pain intensity) dimensions  
 490 of experimental pain<sup>50-56</sup> and reduces pain by engaging brain regions important for the cognitive and affective  
 491 modulation of pain.<sup>51,53,55-57</sup> Our pilot trial demonstrated the safety, feasibility, and beneficial effects of MBSR on  
 492 migraines.<sup>58</sup> MBSR may prevent migraines by decreasing emotional reactivity (e.g., affective responses to stress),<sup>59-</sup>  
 493 <sup>63</sup> and stress is a well-known migraine trigger.<sup>64-66</sup> MBSR may also train migraineurs to practice non-judgmental  
 494 awareness of sensory events, reducing the affective dimension of pain more than the sensory component, and this  
 495 effect may be greater in those with a greater affective pain component. By measuring both experimental and clinical  
 496 pain, we will be able to test these hypotheses. Further, understanding predictors of response would improve clinical  
 497 utility.

498 Affective components of pain may be targeted in ways that do not involve medication, which is highly desirable in a  
 499 condition that is persistent throughout a lifetime and principally affects women of childbearing potential. Research  
 500 has demonstrated that meditation, a non-pharmacological intervention, differentially decreases the affective over  
 501 sensory responses to experimental pain in healthy controls. After learning to meditate, one's experience of pain is  
 502 altered, with diminished affective responses to pain. We will be able to evaluate this effect in the clinical pain  
 503 condition of migraine by determining if a meditation intervention taught to migraineurs differentially decreases the  
 504 affective responses over the sensory responses to experimental pain. This work will be a novel contribution that  
 505 demonstrates the specific mechanisms of meditation-induced pain relief in migraine patients. In summary,  
 506 distinguishing the sensory from affective components of pain in our research will help us determine if QST  
 507 measurements can be used as a target for treatment. This ultimately will help us further understand the mechanisms  
 508 of meditation induced pain relief and allow for more precise, targeted treatment options.

510 Further, medications alone rarely target the affective/cognitive processes that often play a major role in migraine  
 511 pain and disability. Because of this high affective/cognitive burden of migraine pain, we hypothesize that therapies  
 512 that target these factors may be especially beneficial and may differentially impact the affective component of  
 513 migraine pain. For example, cognitive behavioral therapy (CBT) is efficacious (with Grade A evidence) for migraine  
 514 prevention.<sup>67-70</sup> Mindfulness-Based Stress Reduction (MBSR) has beneficial effects on many health outcomes,  
 515 including chronic pain conditions.<sup>42-49,71-74</sup> MBSR is a standardized course in mindfulness meditation and yoga.<sup>75</sup>  
 516 Mindfulness meditation involves both 1) focused attention on a sensation like the breath while non-judgmentally  
 517 disengaging from distracting thoughts; and 2) open monitoring, with non-reactive present-moment awareness of  
 518 sensory stimuli.<sup>76</sup> These practices cultivate a detached observation of sensory experiences like pain,<sup>49,74</sup> which may  
 519 alter the pain experience, resulting in less pain unpleasantness, pain catastrophizing, emotional reactivity, and more  
 520 pain acceptance.<sup>45,59,60,62,63,77</sup> The active mental training of meditation may also foster a non-reactive approach to life  
 521 stressors. This may decrease emotional reactivity (e.g., affective responses to stress),<sup>59-63</sup> thereby decreasing the  
 522 likelihood of triggering a migraine from stress (a common migraine trigger).<sup>64-66</sup> Further, meditation differentially  
 523 decreases affective (pain unpleasantness) over sensory (pain intensity) response to experimental pain<sup>50-56</sup> and  
 524 engages brain regions important for the cognitive and affective modulation of pain.<sup>51,53,55-57,78,79</sup> Based on this  
 525 research and the models developed by Jensen,<sup>80</sup> Day et al,<sup>81</sup> and Price,<sup>82</sup> we created a simplified *theoretical* model of  
 526 mechanisms of migraine pain relief from MBSR (**Figure 2**). By targeting affective/cognitive factors (**Figure 2, Box**  
 527 **A**), we hypothesize that MBSR: A) prevents migraines from occurring, decreasing migraine frequency; B) decreases  
 528 the affective components of pain so even when migraines do occur, pain unpleasantness is attenuated; and C)  
 529 decreases migraine disability. (**Figure 2**). We will test these hypotheses directly by measuring both experimental  
 530 and clinical pain.

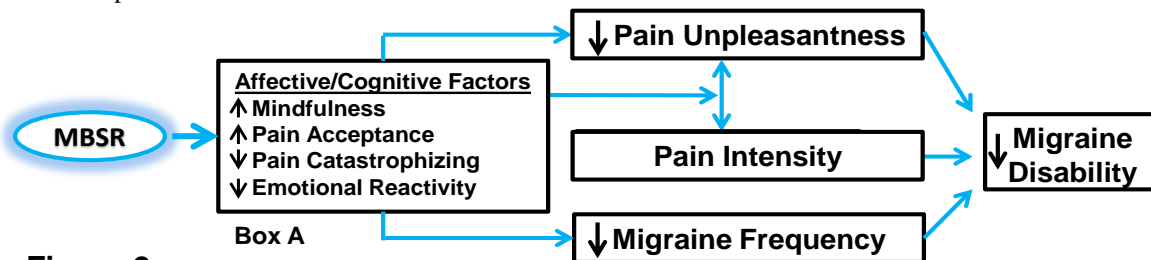

**Figure 2**  
**Theoretical Model of MBSR Mechanisms of Migraine Pain Relief**

531 MBSR also requires time, energy, and healthcare resources. Thus, identifying predictors of response is critically  
 532 important to better target and tailor MBSR to treat migraine. For instance, pain acceptance and pain catastrophizing  
 533 were the most important factors of treatment response of a mindfulness-based cognitive therapy for headache.<sup>83</sup>  
 534 Since mindfulness meditation appears to selectively target these processes, we hypothesize that those with the  
 535 highest baseline levels of pain catastrophizing, emotional reactivity, and the affective component of experimental  
 536 pain will be most likely to respond to MBSR. Increases in pain acceptance and mindfulness and decreases in pain  
 537 catastrophizing and emotional reactivity may be associated with decreases in clinical and experimental pain and  
 538 disability after MBSR.

540 No previous studies have used experimental pain to evaluate mechanisms of meditation on migraine. Measures of  
 541 pain intensity and pain unpleasantness will assess nociceptive processing distinct from clinical pain status, providing  
 542 a means to determine if clinical pain is differentially susceptible to reduction by MBSR. Further, employing  
 543 experimental pain methodologies will allow us to distinguish affective from sensory processing, allowing us to test  
 544 our hypotheses that MBSR reduces the affective more than the sensory experience, and this effect will be greater  
 545 among patients with a greater affective component to their pain.

547 We will be able to determine predictors of MBSR response in migraineurs. Identifying simple and inexpensive ways  
 548 to evaluate response will allow treatments to be targeted to those most likely to benefit.

550 **PRELIMINARY STUDIES**

551 We conducted several epidemiological studies that showed that many adults with neurological conditions, including  
 552 headaches, use complementary and alternative medicine, despite a lack of evidence.<sup>84-89</sup> Further, in adults with  
 553 migraines/severe headaches in the US, the mind-body therapies of deep breathing, meditation, and yoga are the most  
 554 commonly used.<sup>88</sup> However, there have only been a few prior studies with non-standardized meditation and yoga  
 555 interventions in migraine.<sup>90-92</sup> We conducted 2 randomized controlled trials (RCT) of MBSR that demonstrated the  
 556 safety, feasibility, and efficacy of MBSR in adults with mild cognitive impairment<sup>93,94</sup> and migraines.<sup>58</sup> In 19 adults  
 557 with migraines randomized to either MBSR (n=10) or usual care (n=9), MBSR demonstrated no adverse events, 0%  
 558 dropout, excellent adherence (daily meditation average: 34±11 minutes; class average: 6/8 sessions), and promising  
 559 effect sizes across several outcomes, despite being a pilot trial without adequate power (**Table 4**).<sup>58</sup> Theme analyses  
 560 from qualitative interviews revealed that MBSR may also decrease emotional reactivity and improve pain cognitive  
 561 reappraisal processes (e.g., less pain catastrophizing and more pain acceptance). The methods of this pilot trial<sup>58</sup> will  
 562 be applied to this research. The results from this study support future studies with larger sample sizes to evaluate  
 563 mechanisms.

565 **Table 4: Improvements\* in MBSR vs. Control Group after MBSR in Adults with**  
 566 **Migraines**

| <i>Measure</i>               | <i>Change in MBSR vs. Control, d<sup>f</sup></i> | <i>95% CI<sup>f</sup></i> | <i>Comment</i>                              |
|------------------------------|--------------------------------------------------|---------------------------|---------------------------------------------|
| Headaches                    |                                                  |                           | Although underpowered, migraines were:      |
| Frequency of Migraines/month | -1.4 d=0.32                                      | [-4.6, 1.8]               | -less frequent in MBSR group                |
| Severity (0-10 scale)        | -1.3 d=0.61                                      | [-2.3, 0.1]               | -less severe in MBSR group                  |
| Duration (hours)             | -2.9 d=0.75                                      | [-4.6, 0.02]              | -shorter duration in MBSR group             |
| Headache Disability Scores   |                                                  |                           |                                             |
| MIDAS <sup>a</sup>           | -13 d=1.37                                       | [-22, -1]                 | Headache disability decreased in MBSR group |
| HIT-6 <sup>b</sup>           | -5 <sup>c</sup> d=0.91                           | [-11, -1.0]               | Headache disability decreased in MBSR group |
| Additional Measures          |                                                  |                           |                                             |
| Self-Efficacy <sup>d</sup>   | +13 d=0.81                                       | [1, 30]                   | Self-efficacy improved in MBSR group        |
| Mindfulness <sup>e</sup>     | +13 d=0.80                                       | [3, 26]                   | Mindfulness improved in MBSR group          |

567 \*Pilot study was not powered to see differences on these outcomes; a-Migraine Disability Assessment (MIDAS), range: 0-5 (minimal), 6-10  
 568 (mild), 11-20 (moderate), >21 (severe); b-Headache Impact Test-6 (HIT-6), Range 36-78, 60+: severe impact; c-A change of 2.3 points on HIT-6  
 569 reflects the minimum important difference that reflects meaningful clinical change; d-Headache Management Self Efficacy scale, Range 0-175; e-  
 570 Five-Facet Mindfulness Scale, Range 0-195; f=Cohen's d; g-Confidence Interval

571 **STUDY DESIGN**

572 We will conduct a prospective, randomized controlled trial in 98 adults with migraines randomized to either MBSR  
 573 or an education control group. All participants will have migraines (no healthy controls).

574  
 575 **SELECTION AND ENROLLMENT OF PARTICIPANTS**

576 **Table 5: Inclusion Criteria & Exclusion Criteria**

| Inclusion criteria                                                                                                                                                                                                                                                                                                                                                                                                                                                                                                                                                                                                                                                                                                                                                                                                                                                                                                                                                                                   |
|------------------------------------------------------------------------------------------------------------------------------------------------------------------------------------------------------------------------------------------------------------------------------------------------------------------------------------------------------------------------------------------------------------------------------------------------------------------------------------------------------------------------------------------------------------------------------------------------------------------------------------------------------------------------------------------------------------------------------------------------------------------------------------------------------------------------------------------------------------------------------------------------------------------------------------------------------------------------------------------------------|
| <ul style="list-style-type: none"> <li>•Diagnosis of Migraine (see Table 1)</li> <li>•4-20 days/month with migraines</li> <li>•≥1 year of migraines</li> <li>•≥18 years</li> <li>•Able and willing to participate in 8 weekly sessions and possible daily homework 30-45min</li> </ul>                                                                                                                                                                                                                                                                                                                                                                                                                                                                                                                                                                                                                                                                                                               |
| Exclusion criteria                                                                                                                                                                                                                                                                                                                                                                                                                                                                                                                                                                                                                                                                                                                                                                                                                                                                                                                                                                                   |
| <ul style="list-style-type: none"> <li>•Current regular (weekly or more often) practice of meditation or other mind-body intervention</li> <li>•Any major unstable medical/psychiatric illness (e.g., hospitalization within 90 days prior to screening, suicide risk, etc.)</li> <li>•Other non-migraine chronic pain condition (e.g., fibromyalgia, low back pain, etc.) or sensory nerve problems (e.g., neuropathy, Raynaud’s, etc.)</li> <li>•Diagnosis of medication overuse headache (International Classification of Headache Disorders-II)</li> <li>•Volunteers with no pain ratings to frankly noxious stimuli (temperatures &gt; 49°C) or excessive responses to threshold temperatures (~43°C)</li> <li>•Current or planned pregnancy or breastfeeding</li> <li>•Any new medication started within four weeks of screening visit</li> <li>•Unwilling to maintain stable current medication dosages for duration of trial</li> <li>•Failure to complete baseline headache logs</li> </ul> |

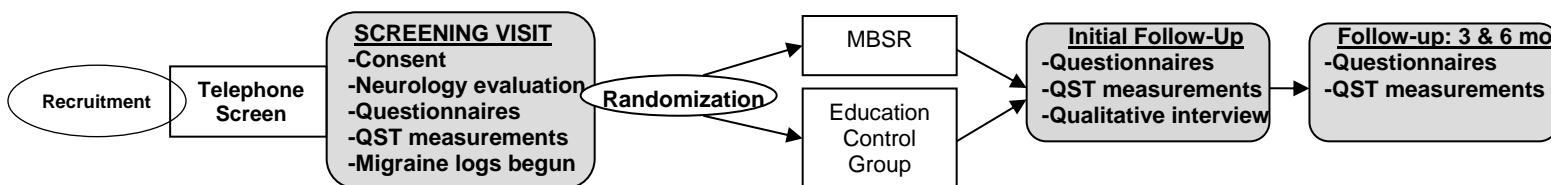

**Figure 3: Part 2 Research Design**

579 **Study Enrollment Procedures**

580 **Recruitment:** We will recruit 7 participants every 3 months over the 42 month recruitment period. The study will  
 581 be run in 6 cohorts. Once ~16 participants meet criteria via phone screening, they will be re-evaluated at the in-  
 582 person screening visit (see below) to ensure they still meet inclusion criteria. After the screening visit, they will  
 583 begin keeping their 4 week headache log (see below); once completed, final determination of inclusion and  
 584 randomization will occur. Recruitment will continue until sample size goals are reached. We will assume ~10%  
 585 dropout (conservative estimate given our 0% dropout rate in our pilot trial), so will aim to recruit 98 participants for  
 586 a final sample of 88 participants. (There may be some overlap of the migraineurs with Part 1).

587  
 588 **Screening Visit:** The study staff will consent participants, confirm migraine diagnosis with history/neurological  
 589 exam (will include Structured Diagnostic Interview for Headache), and have participants 1) confirm that no pain  
 590 relieving medications within 12 hours of study visit, 2) complete baseline questionnaires if they have not been  
 591 completed at home; 3) complete quantitative sensory testing (QST) as described in Part 1; and 4) learn how to  
 592 capture daily migraine information using REDCap electronic data capture tools (or iPod touches for those without  
 593 internet access). Participants will track migraines x 4 weeks to 1) confirm diagnosis; 2) confirm ability to log daily;  
 594 and 3) use as the 4 week “pre-trial” baseline migraine data.

595  
 596 **Randomization:** Once 4-week migraine logs are reviewed by study staff to ensure eligibility, participants will be  
 597 randomized 1:1 to either MBSR or the control group, stratified by migraine frequency (low frequency of 4-9

598 headaches/month or high frequency of 10-20 headaches/month). Treatment assignments will be generated by a  
599 permuted blocks method with randomly varying block size and sealed in numbered, opaque envelopes. Dr. Houle  
600 will generate the randomization (using SAS program “PROC PLAN” statement). Participants in both groups will  
601 continue to track their migraines with their daily REDCap logs for the duration of the trial.

## 602 **STUDY INTERVENTIONS**

### 603 **Interventions, Administration, and Duration**

#### 604 **Interventions and Interactions**

605  
606 **The MBSR Intervention:** The PI has conducted 2 previous RCTS with MBSR and is a trained MBSR instructor.  
607 The MBSR instructor for this trial (not the PI to avoid bias) has been trained in the structured protocol created by  
608 Dr. Kabat-Zinn.<sup>95</sup> Given the feasibility of our pilot trial, we anticipate that this population will have no difficulty  
609 engaging in the standardized protocol. The participants will meet weekly for 8 weeks for 2.5 hours, plus a  
610 “mindfulness retreat day” (approximately 6 hours) after the 6<sup>th</sup> class [9 total classes.] Mindfulness is cultivated  
611 through meditation, body scan (sequential attention to parts of the body), and mindful movement (bodily awareness  
612 during gentle stretching, based on hatha yoga). Participants can share their mindfulness experiences with others. The  
613 instructor also gives information about stress and stress relief. Participants are advised to incorporate mindfulness  
614 into their daily lives so that routine activities (brushing teeth, taking a shower, etc.) become a meditative practice.  
615 Each participant will be given the same standard guided audio recordings and encouraged to practice at home for 30-  
616 45 minutes per day, at least 5 additional days per week. Compliance will be monitored through class attendance and  
617 by daily logs of home practice (using REDCap). Once the course is completed, the participants will be advised to  
618 continue in their daily practice.

619  
620 **The Control Group: Migraine/Stress Education:** The control group will meet for 8 weeks for 2.5 hours, plus a 1  
621 day learning session. Content will include education about migraine pathophysiology, headache triggers, stress, and  
622 gentle stretches. The goal of the control group is to match the time/attention/expectation of the MBSR group,  
623 without providing key MBSR active ingredients of mindfulness meditation or yoga. The group will be taught by a  
624 health care provider trained in headache care.

#### 625 **Concomitant Interventions**

626 Participants may stay on stable dosages of current migraine medications for the duration of the trial, but will be  
627 excluded from starting any new medication within four weeks of screening visit. This makes this study very  
628 generalizable to the general population of migraine patients seeking treatment, as most are already on some form of  
629 pharmacological treatment and will not need to stop such treatment to participate in the trial. Further, it could be  
630 dangerous for a participant to stop migraine medications as it could exacerbate their underlying headache condition.

#### 631 **Adherence Assessment**

632 Adherence to the interventions will be measured by the number of weekly classes/retreat day the participants attend;  
633 participants will be considered “completers” of the intervention if they attend at least 5/9 weekly classes/retreat day.  
634 Participants who are not able to commit to at least 6/8 classes, and attend the very first class, from the onset of the  
635 study will be advised to not participate in the study, so the number of non-completers should be low.

636 The survey assessments will be completed using REDCap and study personnel will ensure all questions are  
637 answered before participants leave each session (See Table 8). Study personnel will also be conducting the QST  
638 pain assessments so adherence to both pain testing and survey assessments will be high.

639 Participants will keep daily headache logs and will receive an email via REDCap with the link to complete these  
640 logs. If a participant misses capturing a day of the log, study staff will contact the participant by phone or email and  
641 reinforce the importance of completing the daily log. Participants in the MBSR group will also keep track of their  
642 assigned home activities with a daily log in a similar way. Participants will also be contacted by phone call, letter, or  
643 email for appointment reminders.

644 After 8 weekly classes have concluded, study participants will be incentivized to keep daily headache logs as  
645 follows:

- 646 1. For each DAY that the participant keeps their headache log on time, their name will be entered into a  
647 drawing (will have the chance to get their name in the drawing up to 30 times in a month)
- 648 2. At the end of the month, a name will be drawn and a winner will receive a \$50 Amazon gift card

## 650 **STUDY PROCEDURES**

651

652

653

**Table 6 - Summary of Schedule of Evaluations – Part 1 – Migraineurs**

| Assessment                                                 | Telephone Screen | Study Visit |
|------------------------------------------------------------|------------------|-------------|
| Confirm Eligibility                                        | X                | X           |
| Review Study Protocol                                      | X                | X           |
| Sign ICF                                                   |                  | X           |
| Allodynia Symptom Checklist                                |                  | X           |
| DERS                                                       |                  | X           |
| PCS                                                        |                  | X           |
| GAD-7                                                      |                  | X           |
| PHQ-9                                                      |                  | X           |
| CPAQ                                                       |                  | X           |
| HIT-6                                                      |                  | X           |
| MIDAS – one month                                          |                  | X           |
| HA management self-efficacy                                |                  | X           |
| MSQOL                                                      |                  | X           |
| Mindfulness, FFM                                           |                  | X           |
| PSS                                                        |                  | X           |
| Herth Hope Index                                           |                  | X           |
| Life Orientation Test                                      |                  | X           |
| Social Connectiveness Scale                                |                  | X           |
| Flourishing Scale                                          |                  | X           |
| Brief Resilience Scale                                     |                  | X           |
| NIH-Promis Measures of Sleep Disturbance                   |                  | X           |
| NIH-Promis Measures of Global Health (first question only) |                  | X           |
| Pittsburgh Sleep Quality Index                             |                  | X           |
| QST Measurements                                           |                  | X           |
| Pain Threshold Testing                                     |                  | X           |
| Vitals                                                     |                  | X           |

654  
 655  
 656  
 657  
 658  
 659  
 660  
 661  
 662  
 663  
 664  
 665  
 666  
 667  
 668  
 669  
 670  
 671  
 672  
 673  
 674

*QST – Quantitative Sensory Testing*

675  
676

**Table 7 - Summary of Schedule of Evaluations – Part 1 – Healthy Volunteers**

| <b>Assessment</b>                                          | <b>Telephone Screen</b> | <b>Study Visit</b> |
|------------------------------------------------------------|-------------------------|--------------------|
| Confirm Eligibility                                        | X                       | X                  |
| Review Study Protocol                                      | X                       | X                  |
| Sign ICF                                                   |                         | X                  |
| Allodynia Symptom Checklist                                |                         | X                  |
| DERS                                                       |                         | X                  |
| PCS                                                        |                         | X                  |
| GAD-7                                                      |                         | X                  |
| PHQ-9                                                      |                         | X                  |
| Mindfulness, FFM                                           |                         | X                  |
| PSS                                                        |                         | X                  |
| Herth Hope Index                                           |                         | X                  |
| Life Orientation Test                                      |                         | X                  |
| Social Connectiveness Scale                                |                         | X                  |
| Flourishing Scale                                          |                         | X                  |
| Brief Resilience Scale                                     |                         | X                  |
| NIH-Promis Measures of Sleep Disturbance                   |                         | X                  |
| NIH-Promis Measures of Global Health (first question only) |                         | X                  |
| Pittsburgh Sleep Quality Index                             |                         | X                  |
| QST Measurements                                           |                         | X                  |
| Pain Threshold Testing                                     |                         | X                  |
| Vitals                                                     |                         | X                  |

677  
678  
679  
680  
681  
682  
683  
684  
685

*QST – Quantitative Sensory Testing*



**Table 8: Summary of Schedule of Evaluations-Part II**

| <b>Assessment</b>                                      | <b>Tele-<br/>phone<br/>Screen</b> | <b>Screening/<br/>Baseline Visit</b> | <b>Phone<br/>Call post<br/>4 week<br/>baseline<br/>Headach<br/>e log</b> | <b>Initial F/U</b> | <b>3mo follow-<br/>up</b> | <b>6 mo follo<br/>w-up</b> |
|--------------------------------------------------------|-----------------------------------|--------------------------------------|--------------------------------------------------------------------------|--------------------|---------------------------|----------------------------|
| Inclusion/Exclusion<br>Criteria                        | X                                 | X                                    |                                                                          |                    |                           |                            |
| Enrollment                                             |                                   | X                                    |                                                                          |                    |                           |                            |
| Vitals                                                 |                                   | X                                    |                                                                          | X                  | X                         | X                          |
| Teach use of REDCap                                    |                                   | X                                    |                                                                          |                    |                           |                            |
| Informed Consent<br>Form                               |                                   | X                                    |                                                                          |                    |                           |                            |
| Randomization                                          |                                   |                                      | X                                                                        |                    |                           |                            |
| Sociodemographic<br>information                        |                                   | X                                    |                                                                          |                    |                           |                            |
| Neurology Evaluation                                   |                                   | X                                    |                                                                          |                    |                           |                            |
| Headache Log                                           |                                   | Begin                                | Continue                                                                 | Continue           | Continue                  | Conti<br>nue               |
| QST Heat Pain<br>Assessments                           |                                   | X                                    |                                                                          | X                  | X                         | X                          |
| INSTRUMENTS                                            |                                   | X                                    |                                                                          | X                  | X                         | X                          |
| Mindfulness-FFM                                        |                                   | X                                    |                                                                          | X                  | X                         | X                          |
| Emotion<br>Regulation-DERS                             |                                   | X                                    |                                                                          | X                  | X                         | X                          |
| Pain<br>Catastrophizing-<br>PCS                        |                                   | X                                    |                                                                          | X                  | X                         | X                          |
| Pain Acceptance-<br>CPAQ                               |                                   | X                                    |                                                                          | X                  | X                         | X                          |
| Headache-<br>related Disability<br>-HIT-6              |                                   | X                                    |                                                                          | X                  | X                         | X                          |
| Headache-<br>related Disability<br>-MIDAS-one<br>month |                                   | X                                    |                                                                          | X                  | X                         | X                          |
| HA Management<br>Self –Efficacy                        |                                   | X                                    |                                                                          | X                  | X                         | X                          |
| Quality of Life-<br>MSQOL, V.21                        |                                   | X                                    |                                                                          | X                  | X                         | X                          |
| Perceived Stress-<br>PSS-10                            |                                   | X                                    |                                                                          | X                  | X                         | X                          |
| Depression-PHQ-<br>9                                   |                                   | X                                    |                                                                          | X                  | X                         | X                          |
| Anxiety-GAD-7                                          |                                   | X                                    |                                                                          | X                  | X                         | X                          |
| Hope-Herth Hope<br>Index (HHI)                         |                                   | X                                    |                                                                          | X                  | X                         | X                          |
| Optimisim-Life<br>Orientation Test-<br>revised (LOT-R) |                                   | X                                    |                                                                          | X                  | X                         | X                          |
| <b>Assessment</b>                                      | <b>Tele-<br/>phone</b>            | <b>Screening/<br/>Baseline Visit</b> | <b>Phone<br/>Call post</b>                                               | <b>Initial F/U</b> | <b>3mo follow-<br/>up</b> | <b>6 mo follo</b>          |

|                                                                         | Screen |   | 4 week<br>baseline<br>Headach<br>e log |                                |          | w-up         |
|-------------------------------------------------------------------------|--------|---|----------------------------------------|--------------------------------|----------|--------------|
| NIH PROMIS<br>Sleep<br>Disturbance                                      |        | X |                                        | X                              | X        | X            |
| NIH PROMIS<br>Global Health<br>(first question<br>only)                 |        | X |                                        | X                              | X        | X            |
| Pittsburgh Sleep<br>Quality Index                                       |        | X |                                        | X                              | X        | X            |
| Social<br>Connectedness<br>Scale – Revised                              |        | X |                                        | X                              | X        | X            |
| Flourishing Scale                                                       |        | X |                                        | X                              | X        | X            |
| Brief Resilience Scale                                                  |        | X |                                        | X                              | X        | X            |
| Credibility/Expectation<br>Questionnaire                                |        | X |                                        | After 2 <sup>nd</sup><br>class |          |              |
| Working Alliance<br>Inventory                                           |        |   | After<br>second<br>class               | X                              |          |              |
| Client Satisfaction<br>Questionnaire                                    |        |   |                                        | X                              |          |              |
| Patient Exit Interview-<br>for Patient Centered<br>Communication Skills |        |   | At end of<br>each 8<br>week<br>class   | X                              |          |              |
| Class Attendance                                                        |        |   | During 8<br>week<br>class              |                                |          |              |
| Home Practice                                                           |        |   | Begin<br>with 1 <sup>st</sup><br>class | Continue                       | Continue | Conti<br>nue |
| Qualitative Interview                                                   |        |   |                                        | X                              |          |              |
| Adverse Events                                                          |        |   | Begin<br>with 1 <sup>st</sup><br>class | Continue                       | Continue | Conti<br>nue |
| Allodynia Symptom<br>Checklist                                          |        | X |                                        | X                              | X        | X            |

687 FFM-Five Factor Mindfulness Scale  
688 DERS-Difficulty in Emotion Regulation  
689 PCS-Pain Catastrophizing Scale  
690 CPAQ-Chronic Pain Acceptance Questionnaire  
691 HIT-6: Headache Impact Test-6  
692 MIDAS-Migraine Disability Assessment-one month  
693 MSQOL-Migraine Specific Quality of Life, version 2.1  
694 PSS-10-Perceived Stress Scale 10  
695 PHQ-9: Patient Health-related Questionnaire-depression module 9  
696 GAD-7: Generalized Anxiety Disorder 7  
697  
698  
699  
700

**Telephone Screen:**

A study investigator will contact interested participants for a pre-screening telephone interview. At the beginning of the phone call, potential subjects will be informed of the nature and sensitivity of the questions, asked whether this is an appropriate time for them to answer these questions, and told how long the phone call is expected to take. Participants will be offered the option of completing the pre-screening in person, if they wish and if it is feasible. The pre-screening telephone interview will be performed to explain the protocol, determine eligibility, discuss informed consent, and answer questions. If eligible, they will then be offered participation. Those interested and eligible will be either immediately scheduled for a screening visit or will be called in the future to set it up. A letter will then be sent to them, with the consent form attached for review ahead of time if they would like, in advance of their study visit.

**Baseline Visit:**

The study staff will:

**A-Consent Participants-Consenting procedures:**

We will obtain consent before the experiment begins. At the onset of the study visit, participants will be provided informed consent by the PI or a qualified study team member. The consenting process will occur in a private clinic room. Subjects will be given time to ask questions and can discuss with family members. The consent form states the title and purpose of the study, an estimate of how many people may enroll, the duration of participation, the procedures that will be followed, any reasonably foreseeable risks or discomforts, and benefits to the participants or others that may be expected from the research. Information is provided about the disclosure and confidentiality of protected health information they will provide, that there is no cost to participants in the study, who sponsors the study, what happens if they experience an injury or illness as a result of participating, and whom to call if they have a question or problem. Participants will be informed of payment (\$80 for completion of the study; \$10 after the screening visit; \$15 after the initial follow-up visit; \$20 after the 3 month follow-up visit; and \$35 after the 6 month follow-up visit). The telephone number of the Chairman of the Institutional Review Board will also be included for questions regarding rights as research subjects. The consent form will be signed and dated by the participant and by the person obtaining consent. We have obtained IRB approval for the study and the informed consent documents (Wake Forest IRB protocol # IRB00027845).

**B-Neurology evaluation** to confirm migraine diagnosis with history/neurological exam.

Neurology evaluation will include vital signs, detailed headache and medical history, neurological exam (will include Structured Diagnostic Interview for Headache), and general physical exam. If participants have a headache at the time of the study visit, they will be rescheduled for a time when headache-free.

**C-Complete baseline sociodemographic information and complete full set of instruments** (See Table 8 for Schedule of assessments for full listing of all instruments)

**D- Experimental Session of Quantitative Sensory Testing (QST) Measurements:**

Thermal Probe: MEDOC TSA-II will deliver thermal stimuli with a 16 x 16 mm thermal probe. All temperatures will be < 50°C and no stimulus as designed produces tissue damage. We have significant experience using this technique and probe with no adverse events (Coghill's lab on > 750 subjects).

Psychophysical Training: To gain experience rating pain, subjects will be familiarized with 32, 5-second duration stimuli (35 to 49°C) with the Visual Analogue Scale (VAS), a 15 cm plastic sliding scale used to quantify pain sensation intensity and degree of unpleasantness.<sup>37</sup> The VAS is an ideal pain measurement scale because of its ratio scale properties combined with its ease of administration and scoring.<sup>38</sup> The minimum rating is "no pain sensation" or "not all unpleasant" whereas the maximum is designated as "most intense imaginable" or "most unpleasant imaginable." The training will be conducted on the left arm, a location away from increased sensitivity/allodynia of head/neck regions often seen in patients with migraines.

Pain Threshold Assessment: The temperature of the probe will begin at 32°C and will increase at a rate of 0.5°C per second. The subject will be instructed to verbally respond when he or she first detects a sensation of pain. The thermode will return to baseline once the button is pressed. This will be performed up to four times, and the heat pain threshold will be determined as the average of the temperatures at which the stimulus was first perceived as painful (Yarnitsky and Sprecher, 1994). Stimulus temperatures employed for pain threshold testing will not exceed 50°C. This will be conducted on the right arm.

703  
704  
705  
706  
707  
708  
709  
710  
711  
712  
713  
714  
715  
716  
717  
718  
719  
720  
721  
722

723 **Experimental Session:** We will administer the noxious thermal stimulation on the right calf by starting at 35°C  
724 and increasing with a 6°C rise/fall rate with a 5 second plateau up to the randomly administered temperatures of  
725 43, 45, 47, and 49°C. Each temperature will be repeated x 3 and delivered pseudorandomly. To minimize  
726 sensitization, habituation, and hyperalgesia, all trials will be separated by 30 seconds and systematically  
727 distributed over the calf to minimize repetitive stimulation of the same skin site.<sup>1,37,39</sup> Perception of intensity  
728 and unpleasantness will be measured with the VAS scale after each temperature. Each series will be repeated  
729 twice. Dr. Wells has been trained in the performance and analysis of QST measurements.

730  
731 The specified arm/leg positioning of the probe may be adjusted if needed.

732  
733 **E-Headache Logs-**Participants will be taught by study staff how to capture daily migraine information using  
734 REDCap electronic data capture tools (or iPod touches for those without internet access). Headache logs will  
735 capture migraine day, duration, severity (pain intensity and pain unpleasantness), medications used for  
736 treatment, associated symptoms (nausea, vomiting, photophobia, phonophobia, osmophobia)

737  
738 **Randomization:**

739 After the baseline evaluation, participants will track migraines x 4 weeks to 1) confirm diagnosis; 2) confirm  
740 ability to log daily; and 3) use as the 4 week “pre-trial” baseline migraine data. Once 4-week migraine logs are  
741 reviewed by study staff to ensure eligibility, participants will be randomized 1:1 to either MBSR or the control  
742 group, stratified by migraine frequency (low frequency of 4-9 headaches/month or high frequency of 10-20  
743 headaches/month).. Treatment assignments will be generated by a permuted blocks method with randomly  
744 varying block size and sealed in numbered, opaque envelopes. Dr. Houle will generate the randomization (using  
745 SAS program “PROC PLAN” statement). Participants in both groups will continue to track their migraines with  
746 their daily REDCap logs for the duration of the trial. The PI will be blinded to the randomization groups.

747  
748 **Selection Bias, Blinding and Expectations:** Recruitment materials and consents will state we are studying  
749 “better ways to manage migraines” without describing meditation or yoga. This approach will serve three  
750 purposes: 1) participants will be blinded to the active intervention; 2) we will avoid having participants who are  
751 only interested in MBSR, which could cause selection bias and increase the risk of control group dropouts; 3)  
752 this will minimize differences in expectations (which we will also measure) based on group assignment.

753  
754 **Expectations** will be measured using Credibility/Expectancy Questionnaire<sup>96</sup> at the baseline visit AND after the  
755 2<sup>nd</sup> class session.

756  
757 **Therapeutic Alliance:** The two interventions require instructors with different expertise and cannot be the  
758 same person. However, the quality of the therapeutic relationship between participant and instructor will be  
759 measured after the interventions (at the initial follow-up) using the 12 item Working Alliance Inventory.

760  
761 **Treatment Fidelity:** In addition to having the same instructor for each group lead all cohorts, we will  
762 implement a detailed treatment fidelity plan to monitor and ensure that the design, delivery, and receipt of both  
763 interventions are completed as intended (see Table 9).<sup>97,98</sup> We will also assess satisfaction with the programs  
764 with the Client Satisfaction Questionnaire<sup>99</sup> at the initial follow-up.

769 **Table 9: Assessment of Treatment Fidelity**

| Aspect of Treatment Fidelity  | Way to Ensure Fidelity is Accomplished                                                                                                                                                                                                                                                                                                            | Further details                                                                                                                      |
|-------------------------------|---------------------------------------------------------------------------------------------------------------------------------------------------------------------------------------------------------------------------------------------------------------------------------------------------------------------------------------------------|--------------------------------------------------------------------------------------------------------------------------------------|
| Study Design                  | Both intervention and control groups will receive the same “dose” of 8 weekly 2.5 hour classes, plus one “retreat” day, and may have daily homework of 30-45 minutes/day                                                                                                                                                                          |                                                                                                                                      |
|                               | Both instructors will follow detailed manuals for conducting their intervention                                                                                                                                                                                                                                                                   | MBSR intervention will be conducted according to standard MBSR protocol                                                              |
| Provider Training             | MBSR instructor is certified in teaching MBSR, has taught over 25 MBSR courses                                                                                                                                                                                                                                                                    | Headache education provider is a neurologist with headache expertise                                                                 |
| Treatment Delivery            | Both instructors will be audiotaped during their sessions and 10% of randomly selected audiotapes will be reviewed to confirm treatment delivered as intended using checklists of required elements for each intervention and with evaluations of instructor’s communication style; feedback will be provided if any deviations from expectations |                                                                                                                                      |
|                               | Both instructors will have a standard expected check-list of both critical and minimal intervention components for each session’s goals/requirements and will complete it at the end of each session                                                                                                                                              |                                                                                                                                      |
|                               | Participants will complete Patient Exit Interview to assess Patient Centered Communication Styles <sup>100</sup> of each group leader at the end of each session; participants will complete and place in sealed envelope so participant confidentiality maintained and instructor will not have access                                           | The 2 instructors have been chosen specifically with similar interpersonal skills and levels of compassion with patient interactions |
|                               | Qualitative Interviews will further assess participants’ perceptions of instructors’ warmth and credibility                                                                                                                                                                                                                                       |                                                                                                                                      |
| Treatment Receipt             | Class attendance will be monitored                                                                                                                                                                                                                                                                                                                |                                                                                                                                      |
| Enactment of Treatment skills | Participants will keep a daily log to track home activities if assigned                                                                                                                                                                                                                                                                           |                                                                                                                                      |
|                               | Qualitative interviews will also capture how individuals used/applied skills in their daily lives                                                                                                                                                                                                                                                 |                                                                                                                                      |

770

771 **FOLLOW-UP VISITS**

772 Follow-up visits will occur immediately after the 8 week class is over, 3 months later and 6 months later. At each  
 773 follow-up visit, participants will complete the entire instrument assessment and the QST measurements. In addition,  
 774 at the first follow-up visit, participants will complete a qualitative interview.

775

776 Qualitative Interviews: At the initial follow-up, a 30-minute semi-structured interview will be conducted with  
 777 participants to further explore areas not captured in our standardized quantitative measures. This will be especially  
 778 important in capturing measures of treatment fidelity not already captured, especially in capturing patient/instructor  
 779 interactions and enactment of treatment skills.

780

781

782 **Reporting Procedures**

783

784 **Plans for ensuring necessary medical or professional intervention in the event of adverse effects to the**  
 785 **subjects.** Dr. Wells is a trained clinician and will oversee the interventions. If a medical emergency arises the

786 appropriate steps will be taken to contact emergency services. At each study visit, the PHQ-9 survey will be scored  
787 immediately after completion by the participant. If the participant's responses suggest severe clinical depression, Dr.  
788 Wells will recommend that the participant see their primary care physician for treatment. If the participant's  
789 responses suggest active suicidal ideation, he or she will be sent directly to the emergency department.

790  
791 We will promptly report any unanticipated problems, serious and unexpected adverse events, deviations or protocol  
792 changes to the IRB and Data Safety and Monitoring Board (See Data Safety and Monitoring Board for more details).

793  
794 Serious adverse events (SAEs) that are unanticipated, serious, and possibly related to the study intervention will be  
795 reported to the I-DSMB, Wake Forest School of Medicine IRB, and NCCIH in accordance with requirements.

796  
797 Unexpected fatal or life-threatening AEs related to the intervention will be reported to the NCCIH Program Officer  
798 within 7 days. Other serious and unexpected AEs related to the intervention will be reported to the NCCIH Program  
799 Official within 15 days.

800  
801 Anticipated or unrelated SAEs will be handled in a less urgent manner but will be reported to the I-DSMB, Wake  
802 Forest School of Medicine IRB, NCCIH, and other oversight organizations in accordance with their requirements. In  
803 the annual AE summary, the I-DSMB Report will state that they have reviewed all AE reports.

804  
805 The WFSM Institutional Data & Safety Monitoring Board (I-DSMB) will monitor the study for purposes of  
806 evaluating participant safety and study integrity. The I-DSMB is a Dean-appointed, multi-disciplinary, standing  
807 committee that is available to provide independent oversight for human research studies conducted by WFSM or by  
808 WFSM-affiliated faculty investigators. The board will review the progress of and safety for the study as described  
809 above in Part I. The DSMB will meet to review safety data at least once annually while the study has active  
810 participants, even if the prespecified review targets, as specified above, have not been met. There will be no fee for  
811 the independent monitoring of the study. All protocol deviations and adverse events will be promptly reported to the  
812 I-DSMB as well the IRB. See DSMB plan for more details. See Table 3 above for further details of reporting.

813  
814 **Risks to subjects are reasonable in relation to the anticipated benefits to subjects and others.**

815 The risks in participating in this study are minimal and the benefits can be significant to those who experience  
816 migraines. We will learn how Mindfulness based stress reduction techniques can assist with migraine pain. This  
817 work can be instrumental in employing safe non-pharmacological interventions for migraine pain which may be  
818 particularly beneficial as the MBSR technique can be performed concurrently with medications and have few side  
819 effects and may play a role in reducing stress.

820  
821 **Potential Risks**

822 **Potential physical, psychological, social, legal or other risks, their likelihood of occurring, seriousness to**  
823 **participants.**

824  
825 **Experimental Heat Pain Assessments:** The quantitative sensory testing may cause brief pain, but all  
826 temperatures will be < 50°C and no stimulus as designed produces tissue damage.. The thermal probe used  
827 for this experiment, MEDOC TSA-II, will deliver thermal stimuli with a 16 x 16 mm thermal probe.

828  
829 The subject can easily pull away from the device if the feeling is not tolerable. Dr. Coghill's laboratory  
830 staff are experts in conducting the heat-pain intervention and the temperature of the thermal heat probe will  
831 be monitored at all times. His lab has conducted this procedure on over 750 participants and no serious  
832 adverse events have been associated with this device.

833  
834 **Mindfulness Body Stress Reduction intervention/Headache Education Control Group:** A risk to  
835 taking part in this study is the likelihood of receiving an intervention (that requires time and energy) that  
836 may not be effective in helping to treat migraines. The classes or other study-related procedures may cause  
837 some, all, or none of the side effects listed below.

838 Most Likely

839 Gentle stretching can cause muscle soreness if muscles have not been exercised in a long time. Sitting for  
840 extended periods of time can be uncomfortable. Chairs will be provided for comfort, and participants will  
841 be allowed to move as needed to relieve any discomfort.

842 Less Likely

843 With any activity, there is always a risk of injury. The instructor will advise the participants to avoid any  
844 posture that causes discomfort or pain. The instructor will be attuned to watching for any problems during  
845 each session.

846 Rare

847 There have been rare case reports of meditation or yoga causing a brief limited episode of psychiatric  
848 illness. However, most of these case reports are in individuals with a prior history of unstable psychiatric  
849 illness. There are no known reports of this occurring in anyone in an MBSR class. Having a history of  
850 unstable psychiatric illness is an exclusion criteria for participating in this project so therefore we have in  
851 place an extra precaution to not encounter this risk.

852  
853 **Description of alternative treatments and procedures.** The alternative is to not participate in the study or to refer  
854 to the personal physician for standard treatment.

## 855 **STATISTICAL CONSIDERATIONS**

### 856 **General Design Issues**

857 To examine the hypotheses, we will again rely on mixed effects hierarchical regression models with a distribution  
858 and link function appropriate to the outcome (e.g., binomial distribution and logit link for daily migraine  
859 probability). These models will allow us to fully utilize all of the information (i.e., rather than simply calculating  
860 change scores) by conceptualizing each diary entry as nested within a diary phase (baseline 4 weeks prior to  
861 randomization, 8 weeks of treatment, and 3 and 6 months of follow-up), within a person (random effects), who is  
862 nested within a treatment group. Missing data will be scrutinized and we will utilize sensitivity analyses and/or  
863 multiple imputation as required. The models will be conducted as described below:

864 *Hypothesis 2a: MBSR will decrease the primary outcome of migraine frequency compared to an education control*  
865 *group;*

866 *Hypothesis 2b: MBSR will differentially affect the secondary outcome of the affective component (pain*  
867 *unpleasantness) of experimental heat pain compared to the education control group.*

868 *Hypothesis 2c: MBSR will improve the secondary outcomes of mindfulness, emotion regulation, pain acceptance,*  
869 *pain catastrophizing, and headache-related disability compared to an education control group.*

870 *Hypothesis 3A: High levels of baseline pain catastrophizing and emotional reactivity scores and high baseline*  
871 *levels of pain unpleasantness for experimental pain will predict the primary outcome response (migraine frequency)*  
872 *to MBSR.*

873 *Hypothesis 3B: Changes in mindfulness after MBSR will be directly associated with improvements in migraine*  
874 *frequency.*

### 875 **Sample Size and Randomization**

876 **Sample Size Calculation:** For hypothesis 2a, using effect sizes from our pilot trial,<sup>58</sup> and by analyzing the data with  
877 our mixed effects hierarchical regression models, 44 participants/group (n=88) will provide >90% power with  
878  $\alpha=0.05$  to detect a difference of 1.3 migraine days/month over the course of the trial (used PASS design)  
879 (Hypothesis 2a). Hypothesis 2b has a similar power function as Part I of this study. For hypothesis 3: since  
880 hypothesis 3b is the most difficult to evaluate, this RCT is powered on this hypothesis. This calculation assumes a  
881 multivariable model examining linear changes with the four predictors (plus intercept and slope). A sample size of  
882 88 participants will give us 80% power with effects as small as  $R^2 \geq 6\%$  in the variance of the slopes; smaller  
883 predictors are unlikely to be clinically significant.<sup>101</sup>

884  
885 **Randomization:** Once 4-week migraine logs are reviewed by study staff to ensure eligibility, participants will be  
886 randomized 1:1 to either MBSR or the education control group, stratified by migraine frequency (low frequency of  
887 4-9 headaches/month or high frequency of 10-20 headaches/month).. Treatment assignments will be generated by a  
888 permuted blocks method with randomly varying block size and sealed in numbered, opaque envelopes. Dr. Houle  
889 will generate the randomization (using the statistical SAS program “PROC PLAN” statement) and deliver the  
890 envelopes to the PI. Participants in both groups will continue to track their migraines with their daily REDCap logs for  
891 the duration of the trial.

### 892 **Definition of Populations**

893 As done in prior behavioral headache research,<sup>69</sup> all participants who attend at least ONE class will be included in  
894 the intention-to-treat analyses. This is a modified “intent to treat” analysis that ensures exposure to the independent  
895 variable and is used and felt to be very important by behavioral scientists.

### 896 **Outcomes**

897 Our primary outcome will be change in frequency of migraine days, defined as a calendar day (00:00 to 23:59)<sup>102</sup>  
898 when the patient reports 4 or more continuous hours of a moderate to severe headache (rating of 6-10 on 0-10 VAS  
899 pain intensity scale) and/or they treated a headache with abortive medication. Participants will track their headaches  
900 daily with REDCap logs to demonstrate frequency, severity (both pain intensity and pain unpleasantness, as trained  
901 with QST), medications, and associated migraine symptoms (e.g., photophobia, phonophobia, nausea, vomiting).  
902 iPod Touch devices with Pendragon software will be available to those without internet access.

903  
904 Secondary outcomes include changes in migraine severity (measured by pain intensity and unpleasantness on 0-10  
905 VAS scale), migraine duration (hrs), frequency of headache days, headache duration, headache severity (measured  
906 by pain intensity and unpleasantness on 0-10 VAS scale), experimental heat pain intensity and unpleasantness (QST  
907 measurements), and changes in scores on validated measures of mindfulness, pain acceptance, pain catastrophizing,

908 emotional reactivity, and headache-related disability compared to an education control group; determine factors that  
909 predict MBSR response on migraine pain. A headache day is defined as any day when a participant reports the  
910 presence of a headache.

911  
912 We will also characterize participants before/after the intervention using measures of hope, optimism, quality of life,  
913 depression, anxiety, perceived stress, self-efficacy, sleep, fatigue, pain interference, satisfaction with participation in  
914 social roles, allodynia, and global health.

915  
916 All the secondary outcomes and additional measures will be assessed with these standardized, reliable, well-  
917 validated instruments: Five-Facet Mindfulness Questionnaire (mindfulness),<sup>57,103</sup> DERS (emotion regulation),<sup>3,104</sup>  
918 PCS (pain catastrophizing),<sup>2,36</sup> Chronic Pain Acceptance Questionnaire (pain acceptance),<sup>105</sup> Herth Hope Index  
919 (hope),<sup>106</sup> Life Orientation Test-Revised (optimism),<sup>107</sup> Headache Impact Test-6 (HIT-6) (headache related  
920 disability),<sup>108-110</sup> Migraine Disability Assessment (MIDAS)-one month (headache related disability),<sup>111,112</sup> Patient  
921 Health Questionnaire-depression module, PHQ-9 (depression),<sup>34</sup> Generalized Anxiety Disorder-7, GAD-7  
922 (anxiety),<sup>35</sup> Headache Management Self-Efficacy Scale (self-efficacy),<sup>113</sup> Migraine Specific Quality of Life  
923 Questionnaire, version 2.1 (MSQv2.1) (quality of life),<sup>114,115</sup> the Perceived Stress Scale 10, PSS (perceived stress),  
924<sup>116</sup> the Brief Resilience Scale, the Resilience Scale for Adults, the Flourishing Scale, the Social Connectedness  
925 Scale-Revised (SCS-R), the Pittsburgh Sleep Quality Index, the Allodynia Symptom Checklist (ASC-12), and well-  
926 validated NIH Patient Reported Outcomes Measurement Information System (PROMIS) measures of sleep, fatigue,  
927 pain interference, satisfaction with participation in social roles, and global health. Changes from baseline to initial  
928 follow-up will be primary outcomes; secondary outcomes will include changes from baseline to follow-ups at 3 and  
929 6 months.

### 930 931 **Additional Information Collected**

932 Sociodemographic and clinical information will be collected at the screening visit.

933  
934 Expectations for improvement: Expectations can impact results.<sup>39,117</sup> At baseline and after the second session,  
935 participants will rate their expectations using the Credibility/Expectancy Questionnaire.<sup>96</sup>

936  
937 Class Attendance and Home Practice: Participants in both groups will track their home activities up to the 6-month  
938 follow-up visit via REDCap logs and the instructors will track patient class attendance.

939  
940 Qualitative Interviews: At the initial follow-up, a 30-minute semi-structured interview will be conducted with  
941 participants to further explore areas not captured in our standardized quantitative measures.

### 942 **Data Analyses**

943 Analysis 2a: The probability that an individual experiences a migraine on any given day will be examined as a  
944 function of group (MBSR vs. control) and treatment phase. A statistically significant group x phase interaction will  
945 be interpreted as evidence that treatment differentially impacted the daily probability of migraine. This effect size  
946 will be indexed by converting the daily probability to headache counts as recommended for clinical trials in  
947 headache.<sup>118</sup> If necessary we will model change using polynomial trajectories (i.e., growth curves) to better fit the  
948 time-course of treatment.

949 Analysis 2b: To examine this hypothesis, we will conduct an ANCOVA with pain unpleasantness at post-treatment  
950 as the dependent variable, group as the independent variable, and pain unpleasantness at pre-treatment as the  
951 covariate.

952 Analysis 2c: This analysis is identical to 2b, with the appropriate outcomes.

953 Analysis 3a: Baseline levels of pain catastrophizing and emotional reactivity will be used as predictors in the  
954 multilevel models predicting the trajectory of migraine attacks over the course of treatment.

955 Analyses 3b: This analysis is similar to 3a, except that changes in mindfulness (i.e., change scores from pre-  
956 treatment to post-treatment) will be used as predictor of migraine trajectory.

### 957 **DATA COLLECTION AND QUALITY ASSURANCE**

#### 958 **Data Collection Forms**

959 Information will be collected from REDCap daily headache logs for appropriate diagnosis of migraines  
960 during an initial 4 week period prior to randomization and participants will continue to track daily  
961 headaches for the duration of the trial. Ipad touches with Pendragon software will be available to those  
962 without internet access and unable to use REDCap from home. Experimental heat measurements will be  
963 conducted at baseline and at each of the 3 follow-up evaluations. Participants will also complete standardized  
964 questionnaires using REDCap at baseline and at each of the 3 follow-up evaluations with an option to  
965 complete these questionnaires at home prior to the visit. In addition, a 30 minute qualitative interview will be  
966 conducted at the first follow-up visit to evaluate the participants' experience with the interventions. Each  
967 interview will be audiotaped. Socio-demographic and clinical information will also be collected at the  
968 screening visit.



969 **Description of data that will be recorded on human subjects.** Each 30 minute qualitative interview of  
970 the migraine and control subjects will be audiotaped and then transcribed. Participants will be  
971 photographed one of the study visits. These photos will be stored on the study's secure Ishare. Each  
972 subject will have provided informed consent to perform this.

973 **Description of linkages to subjects and who will have access to subject identities.** WFSM investigators  
974 and study staff will take measures to ensure the privacy and confidentiality of all study subjects. All  
975 participants will be assigned a study ID (unique ID) that will be used to link participant records and identify  
976 participants within the database. Only study investigators and the study team members will have access to  
977 the identity of participants.

978 **Information about how specimens, records and data are collected; data collected specifically for**  
979 **research.** All data are collected according to IRB approved study protocols specifically for research  
980 purposes. Specimens, records and data will be collected by study investigators, staff and physicians upon  
981 enrollment of the patients.

## 982 **Quality Assurance**

### 983 **Protection Against Risk**

984 **Description of procedures for protecting against or minimizing potential risks, including risks to**  
985 **confidentiality, and assessment of likely effectiveness.** All data collected will be completely confidential. Only  
986 investigators and their staff directly involved in this study will have access to the data. Records and forms will be  
987 kept in a locked file cabinet when not in use. No names will be stored on computer files for data analysis; no  
988 individuals will be identified in the results of this study. Access to computer-stored information will require  
989 knowledge of the data format, filename and password. Dr. Wells will use the results of this study for research only  
990 and not include the results in a medical record. Any data that may be published in scientific journals will not reveal  
991 the subject's identity.

992 **Plans for ensuring necessary medical or professional intervention in the event of adverse effects to the**  
993 **subjects.** Dr. Wells is a trained clinician and will oversee the interventions. If a medical emergency arises the  
994 appropriate steps will be taken to contact emergency services.

### 995 **Institutional Review Board (IRB) Review**

996 This protocol and the informed consent document have been approved by Wake Forest's IRB (Wake Forest IRB  
997 protocol # IRB00027845).

## 998 **PUBLICATION OF RESEARCH FINDINGS**

999 We plan to publish our findings in top-tier scientific, peer-reviewed journals.  
1000  
1001  
1002

## 1003 **PROTOCOL REFERENCES**

- 1004 1. Starr CJ, Houle TT, Coghill RC. Psychological and sensory predictors of experimental thermal pain: a  
1005 multifactorial model. *The journal of pain : official journal of the American Pain Society*. Dec  
1006 2010;11(12):1394-1402.
- 1007 2. Sullivan MJL, Bishop SR, Pivik J. The Pain Catastrophizing Scale: Development and Validation.  
1008 *Psychological Assessment*. 1995;7(4):524-532.
- 1009 3. Kokonyei G, Urban R, Reinhardt M, Jozan A, Demetrovics Z. The Difficulties in Emotion Regulation  
1010 Scale: Factor Structure in Chronic Pain Patients. *Journal of clinical psychology*. Sep 3 2013.
- 1011 4. Hu XH, Markson LE, Lipton RB, Stewart WF, Berger ML. Burden of migraine in the United States:  
1012 disability and economic costs. *Archives of internal medicine*. Apr 26 1999;159(8):813-818.
- 1013 5. Lipton RB, Bigal ME, Diamond M, Freitag F, Reed ML, Stewart WF, Group AA. Migraine prevalence,  
1014 disease burden, and the need for preventive therapy. *Neurology*. Jan 30 2007;68(5):343-349.
- 1015 6. Lipton RB, Stewart WF, Diamond S, Diamond ML, Reed M. Prevalence and burden of migraine in the  
1016 United States: data from the American Migraine Study II. *Headache*. Jul-Aug 2001;41(7):646-657.
- 1017 7. Leung L. Pain catastrophizing: an updated review. *Indian J. Psychol. Med*. Jul 2012;34(3):204-217.
- 1018 8. Geisser ME, Robinson ME, Keefe FJ, Weiner ML. Catastrophizing, depression and the sensory, affective  
1019 and evaluative aspects of chronic pain. *Pain*. Oct 1994;59(1):79-83.
- 1020 9. Gracely RH, Geisser ME, Giesecke T, Grant MA, Petzke F, Williams DA, Clauw DJ. Pain catastrophizing  
1021 and neural responses to pain among persons with fibromyalgia. *Brain*. Apr 2004;127(Pt 4):835-843.
- 1022 10. Michael ES, Burns JW. Catastrophizing and pain sensitivity among chronic pain patients: moderating  
1023 effects of sensory and affect focus. *Ann. Behav. Med*. Jun 2004;27(3):185-194.
- 1024 11. Seminowicz DA, Davis KD. Cortical responses to pain in healthy individuals depends on pain  
1025 catastrophizing. *Pain*. Feb 2006;120(3):297-306.
- 1026 12. Lackner JM, Quigley BM. Pain catastrophizing mediates the relationship between worry and pain suffering  
1027 in patients with irritable bowel syndrome. *Behav. Res. Ther*. Jul 2005;43(7):943-957.
- 1028

- 1029 13. Quartana PJ, Campbell CM, Edwards RR. Pain catastrophizing: a critical review. *Expert Rev. Neurother.* May 2009;9(5):745-758.
- 1030
- 1031 14. Sullivan MJ, Lynch ME, Clark AJ. Dimensions of catastrophic thinking associated with pain experience and disability in patients with neuropathic pain conditions. *Pain.* Feb 2005;113(3):310-315.
- 1032
- 1033 15. Sullivan MJ, Stanish W, Waite H, Sullivan M, Tripp DA. Catastrophizing, pain, and disability in patients with soft-tissue injuries. *Pain.* Sep 1998;77(3):253-260.
- 1034
- 1035 16. Peters ML, Vlaeyen JW, Weber WE. The joint contribution of physical pathology, pain-related fear and catastrophizing to chronic back pain disability. *Pain.* Jan 2005;113(1-2):45-50.
- 1036
- 1037 17. Edwards RR, Bingham CO, 3rd, Bathon J, Haythornthwaite JA. Catastrophizing and pain in arthritis, fibromyalgia, and other rheumatic diseases. *Arthritis Rheum.* Apr 15 2006;55(2):325-332.
- 1038
- 1039 18. Buenaver LF, Edwards RR, Smith MT, Gramling SE, Haythornthwaite JA. Catastrophizing and pain-coping in young adults: associations with depressive symptoms and headache pain. *J. Pain.* Apr 2008;9(4):311-319.
- 1040
- 1041 19. Drahozal DN, Stewart SH, Sullivan MJ. Tendency to catastrophize somatic sensations: pain catastrophizing and anxiety sensitivity in predicting headache. *Cogn. Behav. Ther.* 2006;35(4):226-235.
- 1042
- 1043 20. Holroyd KA, Drew JB, Cottrell CK, Romanek KM, Heh V. Impaired functioning and quality of life in severe migraine: the role of catastrophizing and associated symptoms. *Cephalalgia.* Oct 2007;27(10):1156-1165.
- 1044
- 1045
- 1046 21. Kroner-Herwig B, Jakle C, Frettlow J, Peters K, Seemann H, Franz C, Basler HD. Predicting subjective disability in chronic pain patients. *Int. J. Behav. Med.* 1996;3(1):30-41.
- 1047
- 1048 22. Buse DC, Silberstein SD, Manack AN, Papapetropoulos S, Lipton RB. Psychiatric comorbidities of episodic and chronic migraine. *Journal of neurology.* Aug 2013;260(8):1960-1969.
- 1049
- 1050 23. Smitherman TA, Davis RE, Walters AB, Young J, Houle TT. Anxiety sensitivity and headache: Diagnostic differences, impact, and relations with perceived headache triggers. *Cephalalgia.* Oct 28 2014.
- 1051
- 1052 24. Smitherman TA, Maizels M, Penzien DB. Headache chronification: screening and behavioral management of comorbid depressive and anxiety disorders. *Headache.* Jan 2008;48(1):45-50.
- 1053
- 1054 25. Ashina S, Serrano D, Lipton RB, Maizels M, Manack AN, Turkel CC, Reed ML, Buse DC. Depression and risk of transformation of episodic to chronic migraine. *J Headache Pain.* Nov 2012;13(8):615-624.
- 1055
- 1056 26. Schwedt TJ, Krauss MJ, Frey K, Gereau RWt. Episodic and chronic migraineurs are hypersensitive to thermal stimuli between migraine attacks. *Cephalalgia : an international journal of headache.* Jan 2011;31(1):6-12.
- 1057
- 1058 27. Nahman-Averbuch H, Granovsky Y, Coghill RC, Yarnitsky D, Sprecher E, Weissman-Fogel I. Waning of "Conditioned Pain Modulation": A Novel Expression of Subtle Pronociception in Migraine. *Headache.* Apr 17 2013.
- 1059
- 1060 28. Stankewitz A, Schulz E, May A. Neuronal correlates of impaired habituation in response to repeated trigemino-nociceptive but not to olfactory input in migraineurs: an fMRI study. *Cephalalgia.* Mar 2013;33(4):256-265.
- 1061
- 1062 29. Lev R, Granovsky Y, Yarnitsky D. Enhanced pain expectation in migraine: EEG-based evidence for impaired prefrontal function. *Headache.* Jul-Aug 2013;53(7):1054-1070.
- 1063
- 1064 30. Schwedt TJ, Zuniga L, Chong CD. Low heat pain thresholds in migraineurs between attacks. *Cephalalgia : an international journal of headache.* Sep 22 2014.
- 1065
- 1066 31. Kitaj MB, Klink M. Pain thresholds in daily transformed migraine versus episodic migraine headache patients. *Headache.* Sep 2005;45(8):992-998.
- 1067
- 1068 32. Hassinger HJ, Semenchuk EM, O'Brien WH. Appraisal and coping responses to pain and stress in migraine headache sufferers. *Journal of behavioral medicine.* Aug 1999;22(4):327-340.
- 1069
- 1070 33. Price DD, Harkins SW, Baker C. Sensory-affective relationships among different types of clinical and experimental pain. *Pain.* Mar 1987;28(3):297-307.
- 1071
- 1072 34. Kroenke K, Spitzer RL, Williams JB. The PHQ-9: validity of a brief depression severity measure. *Journal of general internal medicine.* Sep 2001;16(9):606-613.
- 1073
- 1074 35. Spitzer RL, Kroenke K, Williams JB, Lowe B. A brief measure for assessing generalized anxiety disorder: the GAD-7. *Archives of internal medicine.* May 22 2006;166(10):1092-1097.
- 1075
- 1076 36. Osman A, Barrios FX, Kopper BA, Hauptmann W, Jones J, O'Neill E. Factor structure, reliability, and validity of the Pain Catastrophizing Scale. *Journal of behavioral medicine.* Dec 1997;20(6):589-605.
- 1077
- 1078 37. Rosier EM, Iadarola MJ, Coghill RC. Reproducibility of pain measurement and pain perception. *Pain.* Jul 2002;98(1-2):205-216.
- 1079
- 1080 38. Price DD, Bush FM, Long S, Harkins SW. A comparison of pain measurement characteristics of mechanical visual analogue and simple numerical rating scales. *Pain.* Feb 1994;56(2):217-226.
- 1081
- 1082 39. Koyama T, McHaffie JG, Laurienti PJ, Coghill RC. The subjective experience of pain: where expectations become reality. *Proceedings of the National Academy of Sciences of the United States of America.* Sep 6 2005;102(36):12950-12955.
- 1083
- 1084
- 1085
- 1086
- 1087
- 1088

- 1089 40. Vickers AJ. How many repeated measures in repeated measures designs? Statistical issues for comparative  
1090 trials. *BMC medical research methodology*. Oct 27 2003;3:22.
- 1091 41. Harris PA, Taylor R, Thielke R, Payne J, Gonzalez N, Conde JG. Research electronic data capture  
1092 (REDCap)--a metadata-driven methodology and workflow process for providing translational research  
1093 informatics support. *Journal of biomedical informatics*. Apr 2009;42(2):377-381.
- 1094 42. Grossman P, Niemann L, Schmidt S, Walach H. Mindfulness-based stress reduction and health benefits. A  
1095 meta-analysis. *J. Psychosom. Res.* Jul 2004;57(1):35-43.
- 1096 43. Rosenzweig S, Greeson JM, Reibel DK, Green JS, Jasser SA, Beasley D. Mindfulness-based stress  
1097 reduction for chronic pain conditions: variation in treatment outcomes and role of home meditation  
1098 practice. *Journal of psychosomatic research*. Jan 2010;68(1):29-36.
- 1099 44. Chiesa A, Serretti A. Mindfulness-based interventions for chronic pain: a systematic review of the  
1100 evidence. *J. Altern. Complement. Med.* Jan 2011;17(1):83-93.
- 1101 45. Miller JJ, Fletcher K, Kabat-Zinn J. Three-year follow-up and clinical implications of a mindfulness  
1102 meditation-based stress reduction intervention in the treatment of anxiety disorders. *Gen. Hosp. Psychiatry*.  
1103 May 1995;17(3):192-200.
- 1104 46. Kabat-Zinn J. An outpatient program in behavioral medicine for chronic pain patients based on the practice  
1105 of mindfulness meditation: theoretical considerations and preliminary results. *General hospital psychiatry*.  
1106 Apr 1982;4(1):33-47.
- 1107 47. Reiner K, Tibi L, Lipsitz JD. Do mindfulness-based interventions reduce pain intensity? A critical review  
1108 of the literature. *Pain Med.* Feb 2013;14(2):230-242.
- 1109 48. Morone NE, Greco CM, Weiner DK. Mindfulness meditation for the treatment of chronic low back pain in  
1110 older adults: a randomized controlled pilot study. *Pain*. Feb 2008;134(3):310-319.
- 1111 49. Kabat-Zinn J, Lipworth L, Burney R. The clinical use of mindfulness meditation for the self-regulation of  
1112 chronic pain. *J Behav Med.* Jun 1985;8(2):163-190.
- 1113 50. Lutz A, McFarlin DR, Perlman DM, Salomons TV, Davidson RJ. Altered anterior insula activation during  
1114 anticipation and experience of painful stimuli in expert meditators. *Neuroimage*. Jan 1 2013;64:538-546.
- 1115 51. Brown CA, Jones AK. Meditation experience predicts less negative appraisal of pain: electrophysiological  
1116 evidence for the involvement of anticipatory neural responses. *Pain*. Sep 2010;150(3):428-438.
- 1117 52. Grant JA, Courtemanche J, Duerden EG, Duncan GH, Rainville P. Cortical thickness and pain sensitivity in  
1118 zen meditators. *Emotion*. Feb 2010;10(1):43-53.
- 1119 53. Grant JA, Courtemanche J, Rainville P. A non-elaborative mental stance and decoupling of executive and  
1120 pain-related cortices predicts low pain sensitivity in Zen meditators. *Pain*. Jan 2011;152(1):150-156.
- 1121 54. Grant JA, Rainville P. Pain sensitivity and analgesic effects of mindful states in Zen meditators: a cross-  
1122 sectional study. *Psychosom. Med.* Jan 2009;71(1):106-114.
- 1123 55. Zeidan F, Martucci KT, Kraft RA, Gordon NS, McHaffie JG, Coghill RC. Brain mechanisms supporting  
1124 the modulation of pain by mindfulness meditation. *J. Neurosci.* Apr 6 2011;31(14):5540-5548.
- 1125 56. Gard T, Holzel BK, Sack AT, Hempel H, Lazar SW, Vaitl D, Ott U. Pain attenuation through mindfulness  
1126 is associated with decreased cognitive control and increased sensory processing in the brain. *Cereb. Cortex*.  
1127 Nov 2012;22(11):2692-2702.
- 1128 57. Baer RA, Smith GT, Lykins E, Button D, Krietemeyer J, Sauer S, Walsh E, Duggan D, Williams JM.  
1129 Construct validity of the five facet mindfulness questionnaire in meditating and nonmeditating samples.  
1130 *Assessment*. Sep 2008;15(3):329-342.
- 1131 58. Wells RE, Burch R, Paulsen RH, Wayne PM, Houle TT, Loder E. Meditation for migraines: a pilot  
1132 randomized controlled trial. *Headache*. Oct 2014;54(9):1484-1495.
- 1133 59. Hoge EA, Bui E, Marques L, Metcalf CA, Morris LK, Robinaugh DJ, Worthington JJ, Pollack MH, Simon  
1134 NM. Randomized controlled trial of mindfulness meditation for generalized anxiety disorder: effects on  
1135 anxiety and stress reactivity. *J. Clin. Psychiatry*. Aug 2013;74(8):786-792.
- 1136 60. Jain S, Shapiro SL, Swanick S, Roesch SC, Mills PJ, Bell I, Schwartz GE. A randomized controlled trial of  
1137 mindfulness meditation versus relaxation training: effects on distress, positive states of mind, rumination,  
1138 and distraction. *Ann. Behav. Med.* Feb 2007;33(1):11-21.
- 1139 61. Creswell JD, Pacilio LE, Lindsay EK, Brown KW. Brief mindfulness meditation training alters  
1140 psychological and neuroendocrine responses to social evaluative stress. *Psychoneuroendocrinology*. Jun  
1141 2014;44:1-12.
- 1142 62. Garland EL, Gaylord SA, Palsson O, Faurot K, Douglas Mann J, Whitehead WE. Therapeutic mechanisms  
1143 of a mindfulness-based treatment for IBS: effects on visceral sensitivity, catastrophizing, and affective  
1144 processing of pain sensations. *J. Behav. Med.* Dec 8 2011.
- 1145 63. Goldin PR, Gross JJ. Effects of mindfulness-based stress reduction (MBSR) on emotion regulation in social  
1146 anxiety disorder. *Emotion (Washington, D.C.)*. Feb 2010;10(1):83-91.
- 1147 64. Houle TT, Butschek RA, Turner DP, Smitherman TA, Rains JC, Penzien DB. Stress and sleep duration  
1148 predict headache severity in chronic headache sufferers. *Pain*. Dec 2012;153(12):2432-2440.

- 1149 65. De Benedittis G, Lorenzetti A. The role of stressful life events in the persistence of primary headache:  
1150 major events vs. daily hassles. *Pain*. Oct 1992;51(1):35-42.
- 1151 66. Peroutka SJ. What turns on a migraine? A systematic review of migraine precipitating factors. *Current pain  
1152 and headache reports*. Oct 2014;18(10):454.
- 1153 67. Fritsche G, Frettlöh J, Huppe M, Dlugaj M, Matatko N, Gaul C, Diener HC. Prevention of medication  
1154 overuse in patients with migraine. *Pain*. Nov 2010;151(2):404-413.
- 1155 68. Thorn BE, Pence LB, Ward LC, Kilgo G, Clements KL, Cross TH, Davis AM, Tsui PW. A randomized  
1156 clinical trial of targeted cognitive behavioral treatment to reduce catastrophizing in chronic headache  
1157 sufferers. *The journal of pain : official journal of the American Pain Society*. Dec 2007;8(12):938-949.
- 1158 69. Powers SW, Kashikar-Zuck SM, Allen JR, LeCates SL, Slater SK, Zafar M, Kabbouche MA, O'Brien HL,  
1159 Shenk CE, Rausch JR, Hershey AD. Cognitive behavioral therapy plus amitriptyline for chronic migraine  
1160 in children and adolescents: a randomized clinical trial. *Jama*. Dec 25 2013;310(24):2622-2630.
- 1161 70. Schoen JC, Campbell RL, Sadosty AT. Headache in pregnancy: an approach to emergency department  
1162 evaluation and management. *The western journal of emergency medicine*. Mar 2015;16(2):291-301.
- 1163 71. Schmidt S, Grossman P, Schwarzer B, Jena S, Naumann J, Walach H. Treating fibromyalgia with  
1164 mindfulness-based stress reduction: results from a 3-armed randomized controlled trial. *Pain*. Feb  
1165 2011;152(2):361-369.
- 1166 72. Goyal M, Singh S, Sibinga EM, Gould NF, Rowland-Seymour A, Sharma R, Berger Z, Sleicher D, Maron  
1167 DD, Shihab HM, Ranasinghe PD, Linn S, Saha S, Bass EB, Haythornthwaite JA. Meditation programs for  
1168 psychological stress and well-being: a systematic review and meta-analysis. *JAMA Intern Med*. Mar  
1169 2014;174(3):357-368.
- 1170 73. Gaylord SA, Palsson OS, Garland EL, Furot KR, Coble RS, Mann JD, Frey W, Leniek K, Whitehead WE.  
1171 Mindfulness training reduces the severity of irritable bowel syndrome in women: results of a randomized  
1172 controlled trial. *Am. J. Gastroenterol*. Sep 2011;106(9):1678-1688.
- 1173 74. Kabat-Zinn J, Lipworth L, Burney R, Sellers W. Four year follow-up of a meditation-based program for the  
1174 self-regulation of chronic pain: treatment outcomes and compliance. *Clin. J. Pain*. 1986;2:159-173.
- 1175 75. Kabat-Zinn J. *Full Catastrophe Living (revised and updated edition): Using the Wisdom of Your Body and  
1176 Mind to Face Stress, Pain, and Illness*. New York, NY: Random House; 2013.
- 1177 76. Lutz A, Slagter HA, Dunne JD, Davidson RJ. Attention regulation and monitoring in meditation. *Trends  
1178 Cogn Sci*. Apr 2008;12(4):163-169.
- 1179 77. Farb NA, Anderson AK, Segal ZV. The mindful brain and emotion regulation in mood disorders. *Can. J.  
1180 Psychiatry*. Feb 2012;57(2):70-77.
- 1181 78. Farb NA, Segal ZV, Anderson AK. Mindfulness meditation training alters cortical representations of  
1182 interoceptive attention. *Soc. Cogn. Affect. Neurosci*. Jan 2013;8(1):15-26.
- 1183 79. Bushnell MC, Ceko M, Low LA. Cognitive and emotional control of pain and its disruption in chronic  
1184 pain. *Nature reviews. Neuroscience*. Jun 2013;14(7):502-511.
- 1185 80. Jensen MP. Psychosocial approaches to pain management: an organizational framework. *Pain*. Apr  
1186 2011;152(4):717-725.
- 1187 81. Day MA, Jensen MP, Ehde DM, Thorn BE. Toward a theoretical model for mindfulness-based pain  
1188 management. *The journal of pain : official journal of the American Pain Society*. Jul 2014;15(7):691-703.
- 1189 82. Price DD. *Psychological and Neural Mechanisms of Pain*. New York, New York: Raven Press; 1988.
- 1190 83. Day MA, Thorn BE, Rubin NJ. Mindfulness-based cognitive therapy for the treatment of headache pain: A  
1191 mixed-methods analysis comparing treatment responders and treatment non-responders. *Complementary  
1192 therapies in medicine*. Apr 2014;22(2):278-285.
- 1193 84. Bertisch SM, Wells RE, Smith MT, McCarthy EP. Use of relaxation techniques and complementary and  
1194 alternative medicine by American adults with insomnia symptoms: results from a national survey. *J. Clin.  
1195 Sleep Med*. Dec 15 2012;8(6):681-691.
- 1196 85. Erwin Wells R, Phillips RS, McCarthy EP. Patterns of mind-body therapies in adults with common  
1197 neurological conditions. *Neuroepidemiology*. 2011;36(1):46-51.
- 1198 86. Purohit MP, Wells RE, Zafonte R, Davis RB, Yeh GY, Phillips RS. Neuropsychiatric symptoms and the  
1199 use of mind-body therapies. *J. Clin. Psychiatry*. Jun 2013;74(6):e520-526.
- 1200 87. Purohit MP, Wells RE, Zafonte RD, Davis RB, Phillips RS. Neuropsychiatric symptoms and the use of  
1201 complementary and alternative medicine. *PM R*. Jan 2013;5(1):24-31.
- 1202 88. Wells RE, Bertisch SM, Buettner C, Phillips RS, McCarthy EP. Complementary and alternative medicine  
1203 use among adults with migraines/severe headaches. *Headache*. Jul-Aug 2011;51(7):1087-1097.
- 1204 89. Wells RE, Phillips RS, Schachter SC, McCarthy EP. Complementary and alternative medicine use among  
1205 US adults with common neurological conditions. *J Neurol*. Nov 2010;257(11):1822-1831.
- 1206 90. John PJ, Sharma N, Sharma CM, Kankane A. Effectiveness of yoga therapy in the treatment of migraine  
1207 without aura: a randomized controlled trial. *Headache*. May 2007;47(5):654-661.
- 1208 91. Tonelli ME, Wachholtz AB. Meditation-based treatment yielding immediate relief for meditation-naïve  
1209 migraineurs. *Pain Manag. Nurs*. Mar 2014;15(1):36-40.

- 1210 92. Wachholtz AB, Pargament KI. Migraines and meditation: does spirituality matter? *Journal of behavioral medicine*. Aug 2008;31(4):351-366.
- 1211
- 1212 93. Wells RE, Kerr CE, Wolkin J, Dossett M, Davis RB, Walsh J, Wall RB, Kong J, Kaptchuk T, Press D, Phillips RS, Yeh G. Meditation for adults with mild cognitive impairment: a pilot randomized trial. *Journal of the American Geriatrics Society*. Apr 2013;61(4):642-645.
- 1213
- 1214
- 1215 94. Wells RE, Yeh GY, Kerr CE, Wolkin J, Davis RB, Tan Y, Spaeth R, Wall RB, Walsh J, Kaptchuk TJ, Press D, Phillips RS, Kong J. Meditation's impact on default mode network and hippocampus in mild cognitive impairment: a pilot study. *Neuroscience letters*. Nov 27 2013;556:15-19.
- 1216
- 1217
- 1218 95. Kabat-Zinn J. *Full Catastrophe Living: Using the Wisdom of Your Body and Mind to Face Stress, Pain, and Illness*. New York: Random House; 1990.
- 1219
- 1220 96. Devilly GJ, Borkovec TD. Psychometric properties of the credibility/expectancy questionnaire. *Journal of behavior therapy and experimental psychiatry*. Jun 2000;31(2):73-86.
- 1221
- 1222 97. Bellg AJ, Borrelli B, Resnick B, Hecht J, Minicucci DS, Ory M, Ogedegbe G, Orwig D, Ernst D, Czajkowski S. Enhancing treatment fidelity in health behavior change studies: best practices and recommendations from the NIH Behavior Change Consortium. *Health psychology : official journal of the Division of Health Psychology, American Psychological Association*. Sep 2004;23(5):443-451.
- 1223
- 1224
- 1225
- 1226 98. Borrelli B. The Assessment, Monitoring, and Enhancement of Treatment Fidelity In Public Health Clinical Trials. *Journal of public health dentistry*. Winter 2011;71(s1):S52-S63.
- 1227
- 1228 99. Larsen DL, Attkisson CC, Hargreaves WA, Nguyen TD. Assessment of client/patient satisfaction: development of a general scale. *Evaluation and program planning*. 1979;2(3):197-207.
- 1229
- 1230 100. Pbert L, Adams A, Quirk M, Hebert JR, Ockene JK, Luippold RS. The patient exit interview as an assessment of physician-delivered smoking intervention: a validation study. *Health psychology : official journal of the Division of Health Psychology, American Psychological Association*. Mar 1999;18(2):183-188.
- 1231
- 1232
- 1233
- 1234 101. Pan PH, Tonidandel AM, Aschenbrenner CA, Houle TT, Harris LC, Eisenach JC. Predicting acute pain after cesarean delivery using three simple questions. *Anesthesiology*. May 2013;118(5):1170-1179.
- 1235
- 1236 102. Diener HC, Dodick DW, Aurora SK, Turkel CC, DeGryse RE, Lipton RB, Silberstein SD, Brin MF. OnabotulinumtoxinA for treatment of chronic migraine: results from the double-blind, randomized, placebo-controlled phase of the PREEMPT 2 trial. *Cephalalgia*. Jul 2010;30(7):804-814.
- 1237
- 1238
- 1239 103. Baer RA, Smith GT, Hopkins J, Krietemeyer J, Toney L. Using self-report assessment methods to explore facets of mindfulness. *Assessment*. Mar 2006;13(1):27-45.
- 1240
- 1241 104. Gratz KL, Roemer L. Multidimensional assessment of emotion regulation and dysregulation: development, factor structure, and initial validation of the difficulties in emotion regulation scale. *Journal of Psychopathology and Behavioral Assessment*. 2004;26:41-54.
- 1242
- 1243
- 1244 105. McCracken LM, Vowles KE, Eccleston C. Acceptance of chronic pain: component analysis and a revised assessment method. *Pain*. Jan 2004;107(1-2):159-166.
- 1245
- 1246 106. Herth K. Development and refinement of an instrument to measure hope. *Scholarly inquiry for nursing practice*. Spring 1991;5(1):39-51; discussion 53-36.
- 1247
- 1248 107. Scheier MF, Carver CS, Bridges MW. Distinguishing optimism from neuroticism (and trait anxiety, self-mastery, and self-esteem): a reevaluation of the Life Orientation Test. *Journal of personality and social psychology*. Dec 1994;67(6):1063-1078.
- 1249
- 1250
- 1251 108. Kosinski M, Bayliss MS, Bjorner JB, Ware JE, Jr., Garber WH, Batenhorst A, Cady R, Dahlof CG, Dowson A, Tepper S. A six-item short-form survey for measuring headache impact: the HIT-6. *Qual Life Res*. Dec 2003;12(8):963-974.
- 1252
- 1253
- 1254 109. Kawata AK, Coeytaux RR, Devellis RF, Finkel AG, Mann JD, Kahn K. Psychometric properties of the HIT-6 among patients in a headache-specialty practice. *Headache*. Jun 2005;45(6):638-643.
- 1255
- 1256 110. Yang M, Rendas-Baum R, Varon SF, Kosinski M. Validation of the Headache Impact Test (HIT-6) across episodic and chronic migraine. *Cephalalgia*. Feb 2011;31(3):357-367.
- 1257
- 1258 111. Stewart WF, Lipton RB, Dowson AJ, Sawyer J. Development and testing of the Migraine Disability Assessment (MIDAS) Questionnaire to assess headache-related disability. *Neurology*. 2001;56(6 Suppl 1):S20-28.
- 1259
- 1260
- 1261 112. Stewart WF, Lipton RB, Whyte J, Dowson A, Kolodner K, Liberman JN, Sawyer J. An international study to assess reliability of the Migraine Disability Assessment (MIDAS) score. *Neurology*. Sep 22 1999;53(5):988-994.
- 1262
- 1263
- 1264 113. French DJ, Holroyd KA, Pinell C, Malinoski PT, O'Donnell F, Hill KR. Perceived self-efficacy and headache-related disability. *Headache*. Sep 2000;40(8):647-656.
- 1265
- 1266 114. Jhingran P, Davis SM, LaVange LM, Miller DW, Helms RW. MSQ: Migraine-Specific Quality-of-Life Questionnaire. Further investigation of the factor structure. *Pharmacoeconomics*. Jun 1998;13(6):707-717.
- 1267
- 1268 115. Martin BC, Pathak DS, Sharfman MI, Adelman JU, Taylor F, Kwong WJ, Jhingran P. Validity and reliability of the migraine-specific quality of life questionnaire (MSQ Version 2.1). *Headache*. Mar 2000;40(3):204-215.
- 1269
- 1270

- 1271  
1272  
1273  
1274  
1275  
1276  
1277  
1278  
1279  
1280  
1281  
1282
- 116.** Cohen S, Kamarck T, Mermelstein R. A global measure of perceived stress. *Journal of health and social behavior*. Dec 1983;24(4):385-396.
- 117.** Myers SS, Phillips RS, Davis RB, Cherkin DC, Legedza A, Kaptchuk TJ, Hrbek A, Buring JE, Post D, Connelly MT, Eisenberg DM. Patient expectations as predictors of outcome in patients with acute low back pain. *J Gen Intern Med*. Feb 2008;23(2):148-153.
- 118.** Penzien DB. Guidelines for trials of behavioral treatments for recurrent headache: purpose, process, and product. *Headache*. May 2005;45 Suppl 2:S87-89.

1283 **IRB Approved Meaningful Changes to Protocol After Study Initiation<sup>a</sup>**

| Description                                                                                           | Justification                                                                                         | Date of IRB Approval (Amendment Number <sup>b</sup> ) | Time Point in Study Timeline                                                                                                                                | Study Impact                                                                      |
|-------------------------------------------------------------------------------------------------------|-------------------------------------------------------------------------------------------------------|-------------------------------------------------------|-------------------------------------------------------------------------------------------------------------------------------------------------------------|-----------------------------------------------------------------------------------|
| Added exclusion of PHQ-9 >20                                                                          | Clear boundaries for determination of severe depression                                               | 08/19/2016 (10)                                       | After recruitment had initiated; prior to participant enrollment                                                                                            | Ensured standard way to confirm participants with severe depression were excluded |
| Changed inclusion from 4-14 migraines/month to 4-20 migraines/month                                   | Wider inclusion accounted for month-month headache frequency variability                              | 08/25/2016 (12)                                       | After recruitment had initiated; prior to participant enrollment                                                                                            | Widened inclusion criteria eligibility                                            |
| Randomization stratified by migraine frequency                                                        | To ensure balanced groups by migraine frequency                                                       | 10/17/2016 (14)                                       | Prior to randomizing any participants                                                                                                                       | Ensured groups were balanced by migraine frequency                                |
| Changed adherence assessment from 6/8 classes to 5/9 classes/retreat day                              | To create appropriate adherence goals                                                                 | 12/07/2016 (17)                                       | During Cohort 1 classes                                                                                                                                     | Ensured adherence assessments were appropriate                                    |
| Added participants must be able to attend 1 <sup>st</sup> class                                       | To create appropriate adherence goals                                                                 | 12/07/2016 (17)                                       | During Cohort 1 classes                                                                                                                                     | Ensured participants included were available for classes                          |
| Added recruitment would include social media                                                          | Expanded recruitment options                                                                          | 12/16/2016 (20)                                       | Prior to cohort 2 recruitment                                                                                                                               | Increased recruitment strategies                                                  |
| Allowed REDCap questionnaires to be completed remotely for follow-up study visits                     | Increased flexibility of completion of assessment                                                     | 01/30/2017 (23)                                       | Prior to beginning cohort 2 screening visits                                                                                                                | Increased flexibility for study assessments to be completed                       |
| Changed requirement of no headache within 48 hours of study visit to no headache day of study visit   | Unrealistic goal of no headache within 48 hours if participants could have up to 20 headaches/month   | 01/30/2017 (23)                                       | Prior to beginning cohort 2 screening visits                                                                                                                | Decreased need for study visit rescheduling due to headache                       |
| Changed requirement of no pain relieving medication within 24 hours of study visit to within 12 hours | Determined 12 hour time frame was reasonable, as half-life of most medications utilized was <12 hours | 01/30/2017 (23)                                       | Prior to beginning cohort 2 screening visits                                                                                                                | Decreased need for study visit rescheduling due to medication use                 |
| Added a monthly incentive drawing for headache log completion after intervention completion.          | To encourage participants to keep their daily headache logs.                                          | 03/21/2017 (25)                                       | Cohort 1 participants were eligible for 3 of the 6 months of post-class follow-up; all other participants were eligible for all 6 months of study follow-up | Aimed to improved adherence of headache log completions                           |

| Description                                                                                                                                                                              | Justification                                                                                                                                                                                                                                                                                                                                                                           | Date of IRB Approval (Amendment Number <sup>b</sup> ) | Time Point in Study Timeline                     | Study Impact                                                                                                                                                                           |
|------------------------------------------------------------------------------------------------------------------------------------------------------------------------------------------|-----------------------------------------------------------------------------------------------------------------------------------------------------------------------------------------------------------------------------------------------------------------------------------------------------------------------------------------------------------------------------------------|-------------------------------------------------------|--------------------------------------------------|----------------------------------------------------------------------------------------------------------------------------------------------------------------------------------------|
| Removed daily or weekly yoga from the list of exclusion criteria                                                                                                                         | After consulting with other experts the PI concluded that yoga which does not involve mindfulness will not interfere with study results. Meaning, patients who practice yoga that does not have a mindfulness component should be able to participate without any worry that their yoga practice may interfere with the study intervention, and can therefore be included in the study. | 07/13/2017 (30)                                       | Affected participant eligibility for cohorts 4-7 | Widened inclusion criteria eligibility; one participant in cohort 1 had been excluded due to daily yoga; she was re-contacted and no longer eligible (for other reasons) for inclusion |
| Added headache outcomes as secondary outcomes (headache frequency, duration, and intensity); a headache day is defined as any day when a participant reports the presence of a headache. | In finalizing our statistical analyses plan, we recognized we had left off our goal of analyzing headache outcomes as secondary outcomes in addition to migraine outcomes in our protocol                                                                                                                                                                                               | 07/26/2019 (70)                                       | Prior to data analysis                           | Ensured protocol consistent with statistical analysis plan prior to data analysis                                                                                                      |

1284 a: Recruitment began 7/29/2016; enrollment began 8/26/2016. Study date details as seen in Supplement 1, eTable 1.  
1285 b-Additional amendments included those that did not involve meaningful changes to protocol (e.g., personnel changes; those made  
1286 for Part 1) or were done prior to study initiation.  
1287  
1288



## Statistical Analysis Plan

### Statistical Analysis Plan for Randomized Controlled Trial of MBSR vs. Headache Education for Adults with Migraine

**Primary Objective:** The goal of this clinical trial is to evaluate the efficacy and mechanisms of Mindfulness Based Stress Reduction (MBSR) compared to a headache education class in adults with migraines (4-20 migraines/month).

**Registration:** ClinicalTrials.gov Identifier: NCT02695498

**Inclusion/Exclusion Criteria:** Per the study protocol, criteria for inclusion were as follows: clinical diagnosis of migraine (made by UCNS certified neurologist), 4-20 migraines per month,  $\geq 1$  year of migraines,  $\geq 18$  years of age, and ability and willingness to participate in 8 weekly sessions and daily homework lasting 30-45 minutes. Criteria for exclusion were: patients who participated in regular (weekly or more often) meditation, yoga or other mind-body intervention, major unstable medical/psychiatric illness (hospitalization within 90 days prior to screening, suicide risk, etc.), severe clinical depression/anxiety (with PHQ-9 scores  $>20$ ) other non-migraine chronic pain condition or sensory nerve problems, diagnosis of medication overuse headache (by ICHD-II criteria), current or planned pregnancy, any new migraine medications started within 4 weeks of screening, unwilling to maintain stable medication dosages during trial, failure to complete baseline headache logs; no pain ratings to frankly noxious stimuli (temperatures  $> 49^{\circ}\text{C}$ ) or excessive responses to threshold temperatures ( $\sim 43^{\circ}\text{C}$ ).

**Study Design:** This study conducted was a randomized double blinded (participants, PI, data analysts) clinical trial evaluating MBSR and a headache education control group. Prior to intervention, participants were screened over the phone and then in-person to confirm eligibility. Participants were recruited for participation in '8 weekly classes where you will learn information that may help your headaches without additional medications.' Participants were blinded as to the contents of the classes. After the in-person screen, eligible patients kept a 4-week daily headache diary online via REDCap to confirm migraine frequency and ensure no medication overuse headache and determine 'pre-trial' baseline data. Participants were able to stay on all migraine medications during the trial but were asked to remain on stable dosages for duration. Upon approved eligibility, patients were stratified based on headache frequency (low frequency of 4-9 headaches/month or high frequency of 10-20 headaches/month), and within each stratum they were randomized 1:1 into one of two intervention groups – MBSR or a headache education control group. Each class met one day per week for 8 weeks, lasting  $\sim 2$  hours. Participants in each group were asked to keep an online headache diary via REDCap through the duration of the 8 weeks of classes and for 6 months after their final class, recording daily information including whether or not they experienced a headache, and if so, the severity of the headache, the time of headache onset, the duration, and whether or not they took medication. Those in the MBSR group also tracked daily home practice. The intervention was conducted across 7 cohorts. A total of 91 migraine patients were randomized and attended at least 1 class in this study, divided across 7 cohorts. Cohort 1 began this study on July 29, 2016 and the final 6-month follow-up for the 7th cohort being completed by July 17, 2019.

**Primary Outcome:** The **primary outcome** is a change in frequency of migraine days from baseline to the end of the 8-week intervention class. Migraine frequency is defined by number of migraine days experienced per month, where a migraine day is defined as a calendar day (00:00 to 23:59) when the patient reports moderate to severe headache (rating of 6-10 on a 0-10 VAS pain intensity scale) lasting 4 or more continuous hours within a 24-hour period, or were treated with an abortive migraine medication. The primary analysis will evaluate migraine frequency over the final four weeks of the class (weeks 5-8 of the class) compared to the baseline rate in the 4-weeks 'pre-trial'. The primary analysis data set will be based on modified intent to treat (those randomized and attended at least 1 class).

**Essential Secondary Outcomes:** Secondary outcomes in this primary paper will be based on the same time points as the primary outcome (baseline measures vs. immediate follow-up at the end of class). These outcomes will include:

- Assessment of headache frequency (as opposed to the more specifically defined migraine frequency that is the primary outcome)
- Change in HIT-6
- Change in MIDAS-one month
- Change in clinical migraine & headache pain intensity
- Change in clinical migraine & headache pain unpleasantness
- Change in clinical migraine & headache pain duration
- Change in mindfulness (FFM)
- Change in self-efficacy (HA Management self-efficacy)
- Home practice time and class attendance
- Change in pain catastrophizing from baseline (PCS)

- 1348 - Analysis of migraine frequency on a more refined longitudinal scale, i.e. modeling the rate of migraine frequency  
1349 by day or week (as opposed to 4-week periods).  
1350 - Experimental heat pain intensity/unpleasantness [compared to clinical (headache log reported) pain intensity and  
1351 unpleasantness]

1352  
1353 **Additional Secondary Outcomes:**

- 1354 - Analysis of migraine frequency, headache frequency, and all additional secondary outcomes assessed at 3-month  
1355 and 6-month post-class follow-up time points.  
1356 - All additional measures defined in the protocol titled, “Mindfulness and Mechanisms of Pain Processing in Adults  
1357 with Migraines” registered on Clinicaltrials.gov  
1358 - Different subset of scales (e.g. FFM in 5 subscales – is any one of them significant?)  
1359

1360 **Statistical Analysis:** All statistical analysis will be performed using SAS 9.4 and R Statistical Software. To model  
1361 our primary endpoint, we will model migraine rate using a generalized linear mixed model framework. Migraine  
1362 diary entries will be nested within 4-week diary phases. For the primary analysis, this will result in 3 diary phases:  
1363 baseline, first 4-weeks of class, and second 4-weeks of class. The probability of a migraine on any given day will be  
1364 modeled via a logit link function as a function of treatment group, diary phase, patient demographics and controlling  
1365 for within patient and within cohort variation via random effects. Evidence for a difference in migraine rate between  
1366 intervention groups will be based on a statistically significant treatment group and diary phase (time) interaction at a  
1367 0.05 significance level. This effect size will be reported by converting daily headache/migraine probability to the  
1368 expected count of headaches per 4-week period. All covariates will be assessed at a 0.05 level of significance and  
1369 reported with point estimates and 95% confidence intervals.

1370 For analysis of all secondary outcomes, we will model outcomes using a generalized linear mixed model framework  
1371 with appropriate link function (dependent on the outcome) controlling for baseline value for the outcome of interest,  
1372 treatment group, patient demographics, and controlling for within patient and within cohort variation via random  
1373 effects. Evidence of a differential effect between treatment groups related to the outcome of interest will be based on  
1374 significance in the treatment group effect. Assessment of these measures are of an exploratory interest for future  
1375 research, and significance of each outcome will be assessed at 0.05 level of significance without controlling for  
1376 multiple comparisons. Thus it should be noted, any significant results found are meant to provide an indication of  
1377 a potential treatment effect, not confirm one.

1378 In future analyses assessing each outcome over longer follow-up time periods, we will use the same modeling  
1379 framework as outline above for each outcome of interest, assuming time periods of 4-week diary phases extending  
1380 over the entire follow-up time period.

1381 **Alternative Strategies to Modeling:** If needed, we will investigate polynomial trajectories of headache probability  
1382 over time (as opposed to a linear one). Given the complexities of modeling generalized linear mixed models  
1383 (GLMM) in a traditional likelihood framework, convergence issues could pose an issue. If such issues occur, we  
1384 will employ two additional approaches to analysis: 1) We will fit a similar model using a Generalized Estimating  
1385 Equation (GEE) framework with a specified, fixed covariance structure. While less flexible than the GLMM  
1386 framework, the GEE framework will still allow to conduct statistical inference for population level differences  
1387 between intervention groups while accounting for within-patient and cohort variability. 2) We will fit the GLMM  
1388 model in a Bayesian framework, and true effect differences between groups will be assessed using 95% credible  
1389 intervals for the estimated parameters.

1390 **Missing Data and Sensitivity Analysis:**

1391 Headache diary entries may be recorded at irregular intervals, such that, patients may go several days without  
1392 making a headache diary entry and then record several days’ worth of information at one time. This practice has the  
1393 potential to diminish reliability in pain recall (e.g. recall bias), which may affect the diagnosis of a migraine for a  
1394 given day. For our primary analysis, we will assume all headache log information is correct for the date specified on  
1395 the diary entry. All truly missing headache diary data will be imputed for using multiple imputation. Imputed data  
1396 sets for the modified intention to treat will be used for the primary analysis.

1397 In a sensitivity analysis, we will assume identical models using only complete (non-imputed) data, and this will be  
1398 compared to the imputed data analysis. Additionally, we will further analyze the data using only headache diary  
1399 entries for days in which the information was captured within 24 hours of the reported diary day. Headache diary  
1400 logs filled in retrospectively >24 hours later will be treated as missing and imputed for. All sensitivity analysis will  
1401 be reported and discussed in context of the primary analysis.

1402  
1403

## Statistical Details: Data Cleaning, Missing Data

In this section of the supplementary material, we detail the process for data cleaning, how missing data was handled, and the rationale thereof. The primary endpoint of this study (migraine frequency) relied on patient reported data in the form of daily headache diaries in REDCap, ascertaining information including, but not limited to: current date (date of submission), date of headache occurrence, if the headache was still present (i.e. had not yet ended at the time of diary entry), the time the headache started, the time the headache ended (if applicable), the intensity of headache (on a 1-10 scale), the unpleasantness of headache (on a 1-10 scale), and medications taken for headache.

### Data Cleaning

This details the order of execution of data cleaning steps. The original raw data set started with 18,014 diary entries.

- 1) Removed duplicate diary entries for entries that matched with respect to headache presence on a specific headache day. A total of 424 diary entries were removed. These were duplicate entries that contained the same headache information for the same data, so by removing them we avoided “double-counting” headache days.
- 2) Following step 1, there were 139 instances of duplicate days remaining for which the presence of headache did not match (i.e. two entries for the same headache day, one of which said there was a headache and the other said there was not a headache). All 139 cases of this were assessed individually to determine the appropriate duplicated diary day to delete. There were two main reasons for why this occurred:
  - a. The first entry for a day in which ‘no headache’ was recorded was entered earlier in a day before an eventual headache occurred. The second entry for the same corresponding day, either entered later on the same day or in the following days, recorded that a headache occurred after the original entry. In this case, the second entry recording that a headache occurred superseded the original diary entry.
  - b. The duplicated day was an obvious typo. For example, suppose a patient had two diary entries for the date 1/22/17, and in the following month (with diaries date/time stamped for the following month) their sequence of diary entries were: 2/20/17, 2/21/17, 1/22/17, 2/23/17. In this case, the second entry for 1/22/17, date/time stamped in February, was determined to have been a typo error and meant to have been 2/22/17. In these cases, the typo was corrected to the determined correct date.
- 3) Data pulled from REDCap included, in sequence for each patient, only the days in which a diary entry was entered for. If a date of entry was skipped, this day was not reflected in the full longitudinal data set in long format. Thus, the dataset was amended to include days in which a headache diary was missing. At this point in the data cleaning process, there were 92 patients included, each of which had data for 252 days (accounting for nine, 28 day cycles), resulting in a data set of 23,184.
- 4) Start times and end times (if the headache was not still present), were recorded for each diary entry. There were a total of 4,537 headache days recorded. Of those, 1,637 entries were missing an end time. In all of these cases, this was due to the fact that that the headache was reported to be still present. In the case of which a patient reported the headache was still present, but *did not* report a headache the following day, we applied a global decision rule that defined the headache end time to be midnight of the day of headache onset. Following the application of this decision rule, 508 headaches remained without an end time. For the remaining cases of missing end time in which a patient reported a headache was still present and a headache the following day *was reported*, that headache was considered to be the same headache that spanned 2+ days. The end times for these headaches were adjusted to reflect the end time reported on the final day of the headache, and similarly, the start times were set to be the time reported on the first day of the headache. After applying this rule, all headaches had associated end times (i.e. no missing end times remained).
- 5) Participants were requested to enter all times in their headache diaries using a 24 hour clock (e.g. military time). Headache times were calculated by subtracting the reported start time from the reported (or determined from step 4) end time. In 135 headache entries, the reported end time was *before* the reported start time. We assumed this to be a reporting error [likely] due to confusion using the 24-hour reporting window. In these instances, we added 12 hours to the end time. For example, if a patient reported a headache started at 14:00 and ended at 08:00, we assumed 08:00 was meant to be 8:00PM, and thus adding 12 hours to make it 20:00 corrected this. This step alleviated all illogical time discrepancies.
- 6) Patients who failed to continuing filling out headache diaries for at least a week after the intervention began and/or patients who failed to come to any class were excluded from the analysis to make up the modified intention to treat group (n=89).

### Rationale for approach to statistical modeling

For our primary endpoint, we used a linear mixed model with random intercepts for each patient to model change in 28-day headache and migraine frequency from baseline to each follow-up time point. That is, change in migraine frequency was the assumed outcome as a continuous variable, and we assessed a differential treatment effect by

1465 assessing a diary phase X treatment interaction. The follow-up time points extended out to 36 weeks, including the  
 1466 initial 4-week baseline, thus resulting in 9 longitudinal diary phases for each patient. We chose this approach for  
 1467 three reasons: 1) it directly models our primary endpoint (change in 28-day migraine frequency), 2) consistency with  
 1468 other studies in the headache literature [1-3], and 3) aggregating migraine and headache frequency over 28 day  
 1469 intervals allowed for greater efficiency and accuracy with regards to imputing missing data, as will be discussed in  
 1470 the next few paragraphs.

1471  
 1472 With respect to our conducted sensitivity analyses of non-imputed data, we utilized a generalized linear mixed  
 1473 model (GLMM) with logit link function to model log-odds of a migraine on a given day within a diary phase, while  
 1474 controlling for patient heterogeneity via random intercepts. The resulting model allowed us to compute the estimated  
 1475 probability of daily migraine within each diary phase by treatment group. Multiplying the estimated daily  
 1476 probability of migraine for each diary phase by 28 allowed us to then present the results in terms of our original  
 1477 primary endpoint – 28-day migraine frequency. This strategy allowed us to model our data at its most granular level,  
 1478 making use of all available data and without the need to ‘fill-in’ or impute diary entries that were missing.

1479  
 1480 While the idea of analyzing the data at the most granular level is appealing, our primary analysis of the imputed data  
 1481 set (a LMM modeling change scores of aggregate 28-day migraine counts) differed from our complete cases  
 1482 analysis (utilizing the GLMM with logit link approach) due to complexities with imputing missing headache diaries  
 1483 at a day by day level. In our attempt to impute missing headache diary entries at a daily level, imputation results  
 1484 often led to nonsensical results. Given that a single headache can last for several consecutive days at a time,  
 1485 consecutive headache days in a row are not independent. An imputation method involved with directly imputing  
 1486 missing headache diaries at a day-by-day level would need to account for this dependence. Simply put, imputation  
 1487 of headache diaries at a daily level requires a more sophisticated imputation approach than those offered by general  
 1488 imputation methods. Developing and implementing such a method was beyond the scope of the analysis for this  
 1489 paper, but provides an avenue for future research that could improve analysis of future headache studies. In the  
 1490 following section, we will outline the imputation method we employed for handling missing data.

1491  
 1492 **Missing data and Imputation**

1493 There are no established guidelines for handling missing data for headache studies and research into the optimal  
 1494 methods for handling missing data with respect to headache diaries is lacking in the literature. Some studies report  
 1495 using multiple imputation for handling missing data, but the details for how the imputation method was conducted  
 1496 are vague [3-4]. Similar to how we addressed missing data, some studies normalize migraine frequency to 28 days  
 1497 as long as patients filled out a certain proportion of headache diaries for the given 28-day period [4,5], or use a last  
 1498 observation carried forward approach [5,6].

1499  
 1500 We strive to provide full transparency behind our missing data and our approach to missing data imputation. As  
 1501 detailed in the primary paper, if a participant filled out at least half of their headache logs in a 28-day period (i.e.  
 1502 >14), we calculated the frequency based on the available data for that patient during that period and normalized it to  
 1503 a 28-day scale. By doing this, we make the inherent assumption that for patients who fill out at least half of their  
 1504 headache logs, their missing headache logs for that diary phase are not related to whether or not they had a headache  
 1505 on the missing day (i.e. their headache frequency is accurately estimated by the data available). If a patient did not  
 1506 fill out at least half-of their headache logs, we assumed the data to be missing, for which we would impute for  
 1507 assuming data to be missing at random. The frequency for missing data at baseline and follow-up time-points are  
 1508 demonstrated in the following table:

1510 **Headache Log Missing Data Across Follow-Up Time Points**

| Group                     | Time Point |                   |                   |                   |
|---------------------------|------------|-------------------|-------------------|-------------------|
|                           | Baseline   | 12 Weeks<br>n (%) | 24 Weeks<br>n (%) | 36 Weeks<br>n (%) |
| MBSR (n=45)               | 0          | 6 (13%)           | 14 (31%)          | 18 (40%)          |
| Headache Education (n=44) | 0          | 4 (9%)            | 15 (32%)          | 22 (50%)          |

1511  
 1512 To impute missing data, we used Multiple Imputation by Chained Equations implemented in the ‘MICE’ package in  
 1513 R Statistical Software [7]. Variables used to impute missing headache and migraine frequencies included in the  
 1514 imputation model were: headaches, migraines, years with migraine, and classes attended. Headache and migraine  
 1515 days are not truly continuous variable, but instead 28 day counts. To account for this, we imputed missing headache  
 1516 and migraine 28 day counts assuming each to follow a Poisson distribution using a multi-level generalized linear  
 1517 mixed model imputation approach, which accounted for clustering as a result of the longitudinal data [8]. To our  
 1518 knowledge, this is the first headache study to use the approach to impute missing headache data in the literature. Our  
 1519 distributional assumption that headache and migraine counts are Poisson distributed is theoretically appealing, given

1520 that our imputed data based on this assumption means our results will adhere to a strict lower bound of 0 headaches  
1521 per month. Imputing 28-day headache counts assuming a normal distribution, such as that performed by Buettner et  
1522 al. [4], can lead to negative headache days per month, particularly when the variability of headache days per month  
1523 is high in the population. While uncommon, such results were observed for our data when exploring the best method  
1524 of imputation. The implication of this was one of illogical results at an individual level (i.e. negative headache days)  
1525 and bias of the estimated means of migraine and headache days per month at an aggregate level. Future research is  
1526 still needed to assess in greater detail the impact on differing imputation methods on headache data.

1527 **References:**

- 1528 1) Dodick, D. W., Ashina, M., Brandes, J. L., Kudrow, D., Lanteri-Minet, M., Osipova, V., ... Lenz, R. A.  
1529 (2018). ARISE: A Phase 3 randomized trial of erenumab for episodic migraine. *Cephalalgia*, 38(6), 1026–  
1530 1037. <https://doi.org/10.1177/0333102418759786>
- 1531 2) Bigal, M. E., Dodick, D. W., Rapoport, A. M., Silberstein, S. D., Ma, Y., Yang, R., ... & Lipton, R. B.  
1532 (2015). Safety, tolerability, and efficacy of TEV-48125 for preventive treatment of high-frequency episodic  
1533 migraine: a multicentre, randomised, double-blind, placebo-controlled, phase 2b study. *The Lancet*  
1534 *Neurology*, 14(11), 1081-1090.
- 1535 3) Goadsby, Peter J., et al. "A controlled trial of erenumab for episodic migraine." *New England Journal of*  
1536 *Medicine* 377.22 (2017): 2123-2132.
- 1537 4) Buettner, Catherine, et al. "Simvastatin and vitamin D for migraine prevention: a randomized, controlled  
1538 trial." *Annals of neurology* 78.6 (2015): 970-981.
- 1539 5) Dodick, David W., et al. "Safety and efficacy of ALD403, an antibody to calcitonin gene-related peptide,  
1540 for the prevention of frequent episodic migraine: a randomised, double-blind, placebo-controlled,  
1541 exploratory phase 2 trial." *The Lancet Neurology* 13.11 (2014): 1100-1107.
- 1542 6) Zhao, Ling, et al. "The long-term effect of acupuncture for migraine prophylaxis: a randomized clinical  
1543 trial." *JAMA internal medicine* 177.4 (2017): 508-515.
- 1544 7) Stef van Buuren, Karin Groothuis-Oudshoorn (2011). mice: Multivariate Imputation by Chained Equations  
1545 in R. *Journal of Statistical Software*, 45(3), 1-67. URL <https://www.jstatsoft.org/v45/i03/>.
- 1546 8) Kleinke, K., & Reinecke, J. (2015a). Multiple imputation of multilevel count data. In U. Engel, B. Jann, P.  
1547 Lynn, A. Scherpenzeel, and P. Sturgis (Eds.), *Improving Survey Methods: Lessons from Recent Research*  
1548 (pp. 381–396). New York: Routledge, Taylor & Francis  
1549 Group. <http://www.psypress.com/books/details/9780415817622/>

1550  
1551  
1552
