# Supplementary material
Source: PubMed Central journal article supplement (PMC7737157)
Supplement: jamainternmed-e207090-s003.pdf [file jamainternmed-e207090-s003.pdf]

## **Data Sharing Statement**

Wells. Effectiveness of Mindfulness Meditation vs Headache Education for Migraine. *JAMA Intern Med*. Published December 14, 2020. doi:10.1001/jamainternmed.2020.7090

### **Data**

**Data available:** No

### **Additional Information**

**Explanation for why data not available:** Not at this time
